# Supplementary material for: Probing elemental speciation in hydrochar produced from hydrothermal liquefaction of anaerobic digestates using quantitative X-ray diffraction
Source: Royal Society of Chemistry journal article supplement (doi:10.1039/d2se01092e), 2022-01-01
Supplement: d2se01092e1.pdf [file d2se01092e1.pdf]

## SUPPORTING INFORMATION

### **Probing Elemental Speciation in Hydrochar Produced from Hydrothermal Liquefaction of Anaerobic Digestates Using Quantitative X-Ray Diffraction**

Hanifrahmawan Sudiby, <sup>a,b,\*</sup> Jefferson W. Tester<sup>a</sup>

<sup>a</sup>School of Chemical and Biomolecular Engineering and Energy Systems Institute, Cornell University, Ithaca, New York 14853, United States

<sup>b</sup>Chemical Engineering Department, Universitas Gadjah Mada, Yogyakarta 55281, Indonesia

\*corresponding author: [hs987@cornell.edu](mailto:hs987@cornell.edu)

Number of Figures : 15

Number of Tables : 25

Figure S1. HTL Experimental Steps using a 500-mL Parr 4575 SS316 reactor with a Parr 4878 controller to control reaction temperature and stirrer speed (150 rpm).

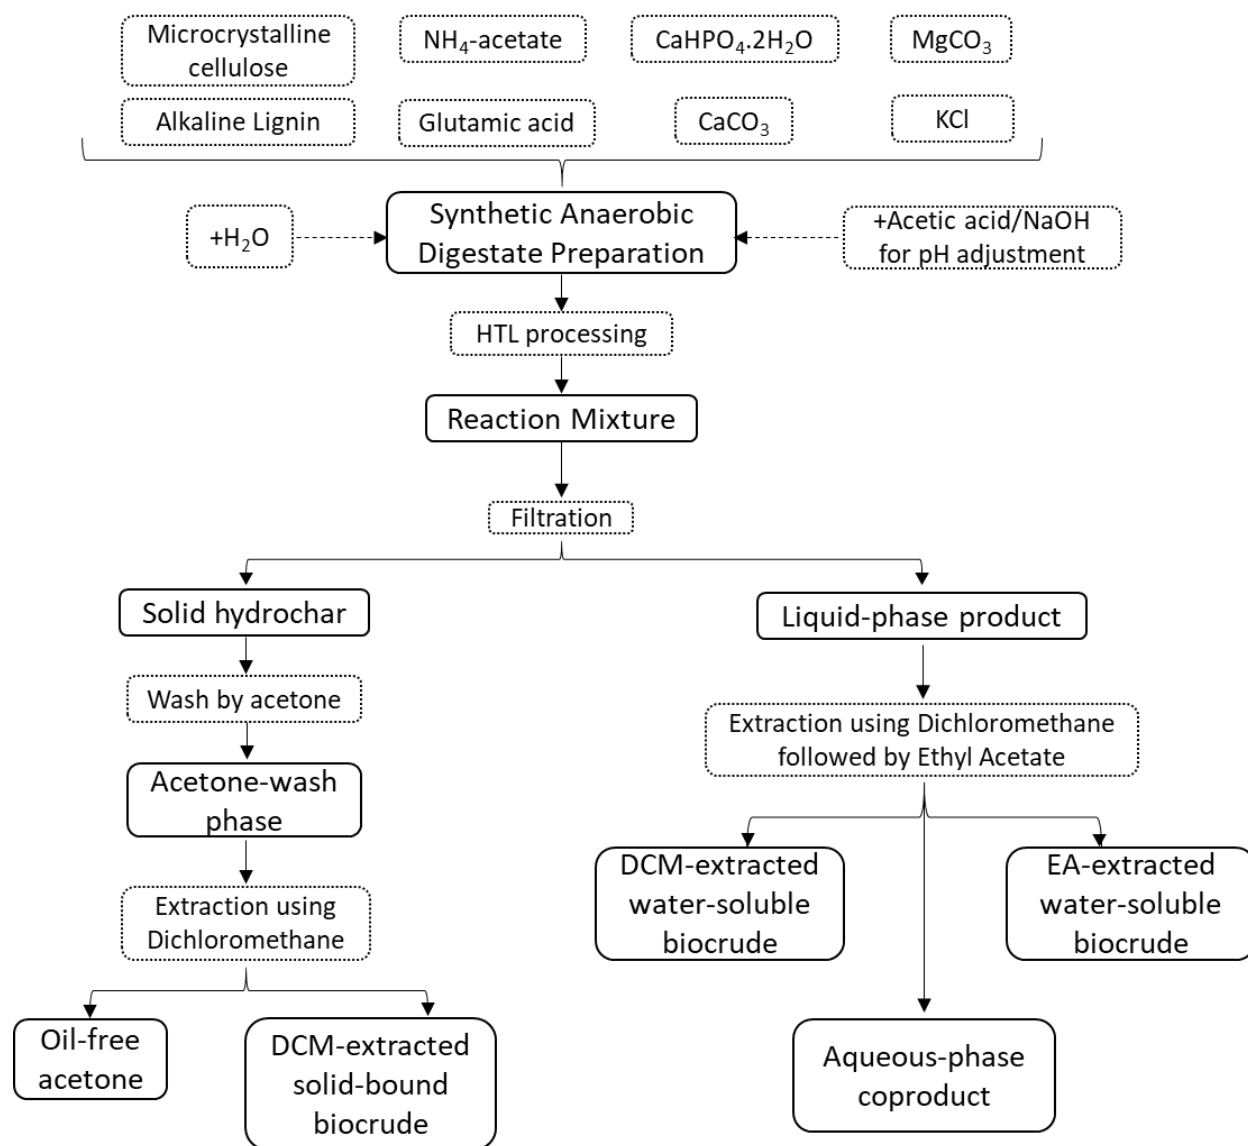

Figure S2. The XRD diffractograms for hydrochar produced from (A) Cel/Lig 0.2, pH 3.5, 320 °C; (B) Cel/Lig 0.2, pH 3.5, 360 °C; (C) Cel/Lig 0.2, pH 8, 320 °C; and (D) Cel/Lig 0.2, pH 8, 360 °C.

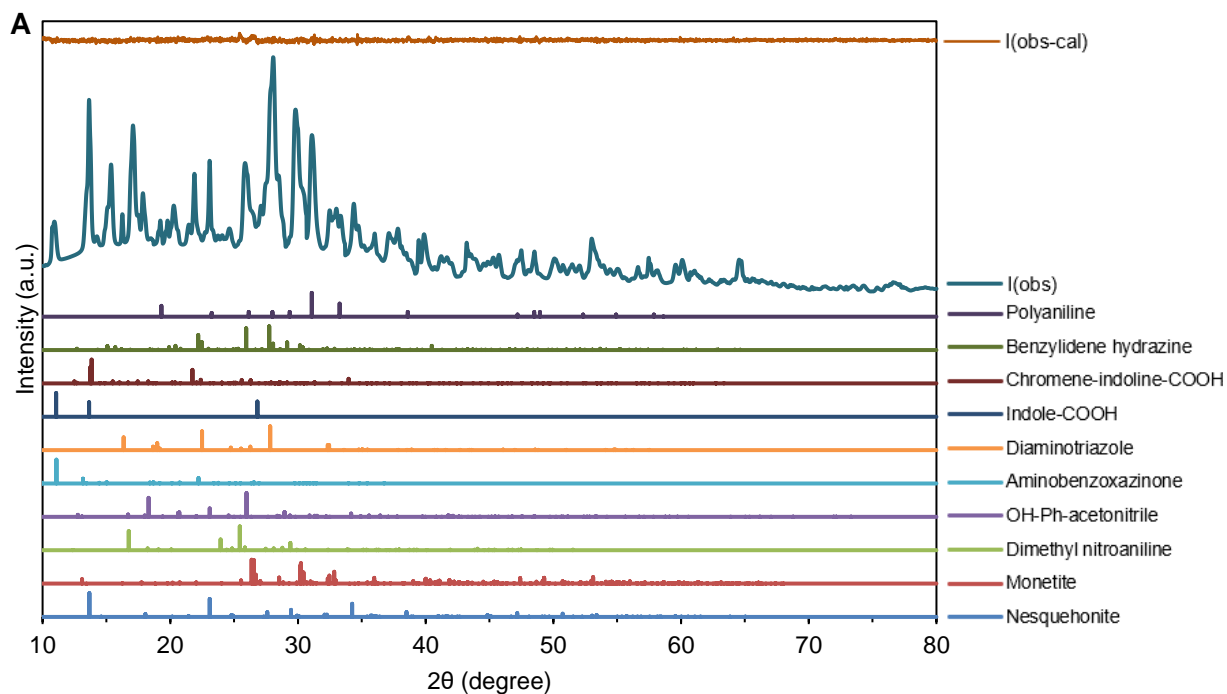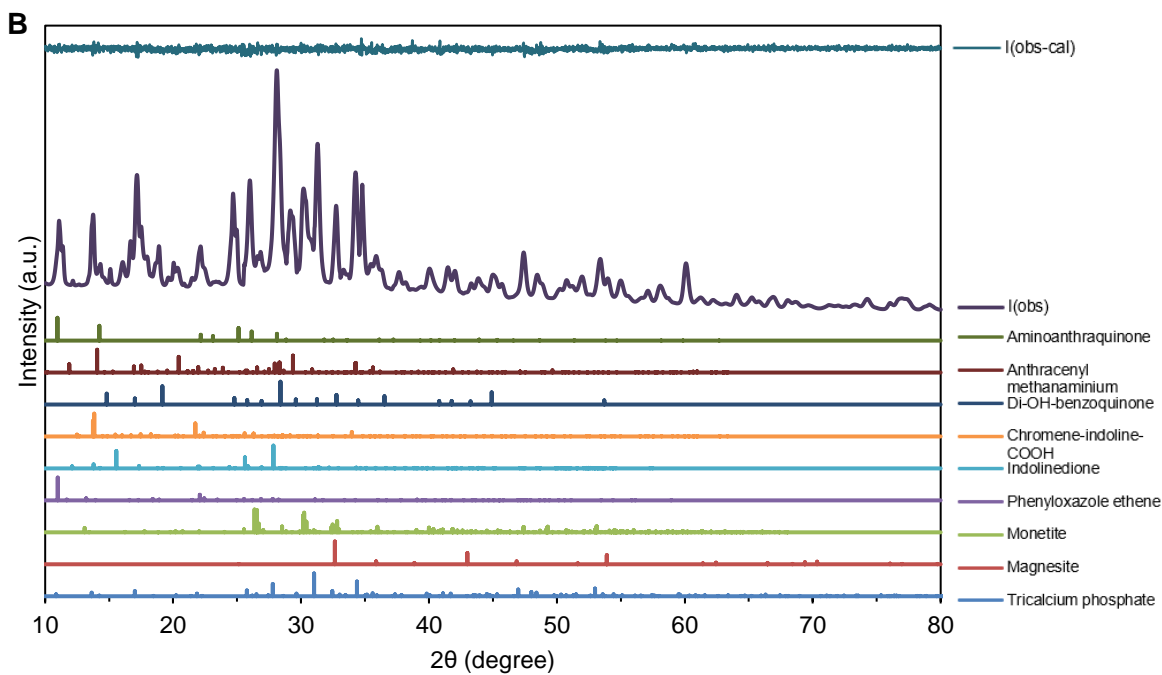

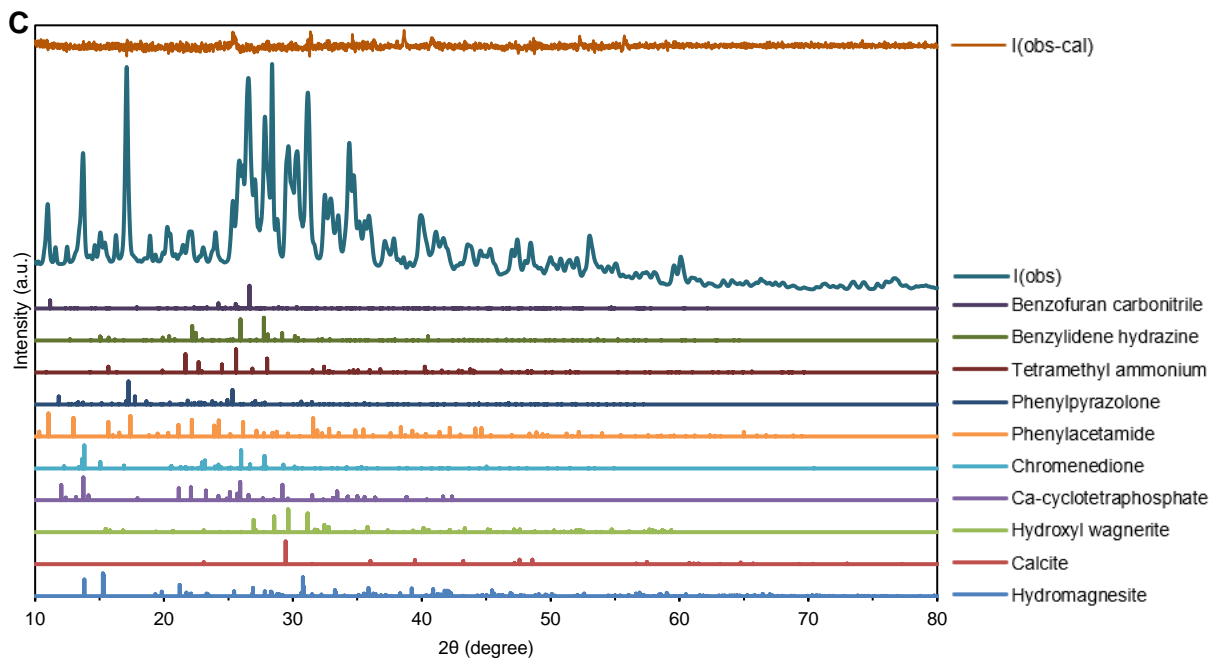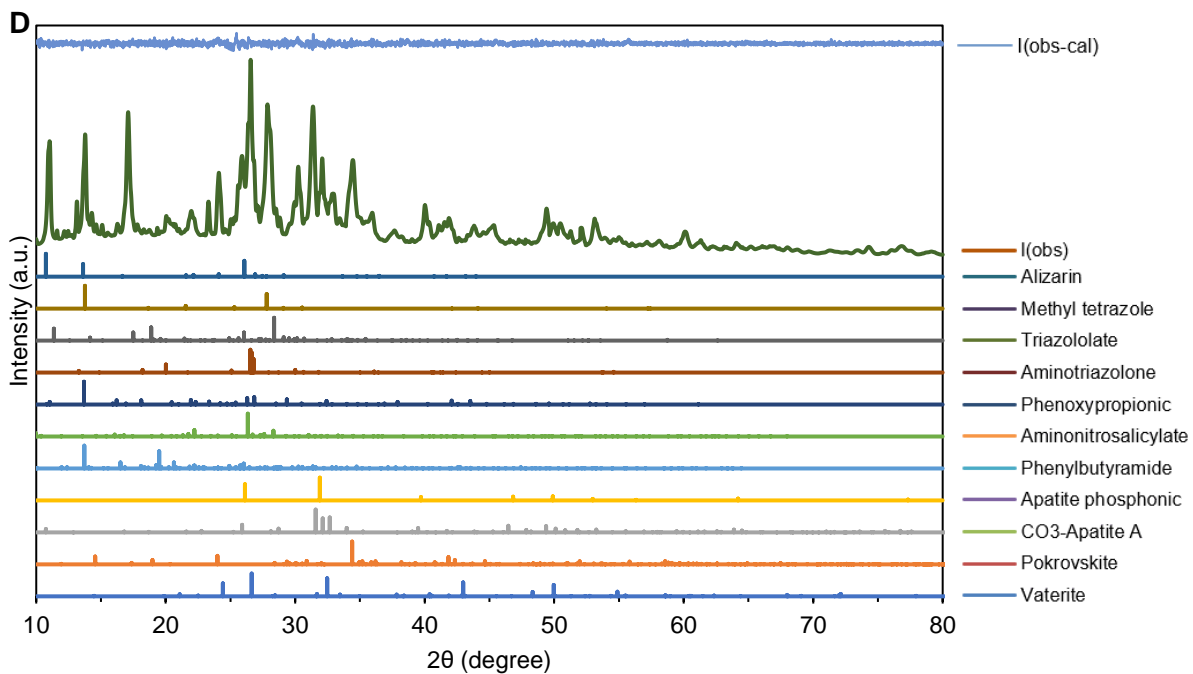

Figure S3. The XRD diffractograms for hydrochar produced from (A) Cel/Lig 1.8, pH 3.5, 320 °C; (B) Cel/Lig 1.8, pH 3.5, 360 °C; (C) Cel/Lig 1.8, pH 3.5, 360 °C; and (D) Cel/Lig 1.8, pH 8, 360 °C

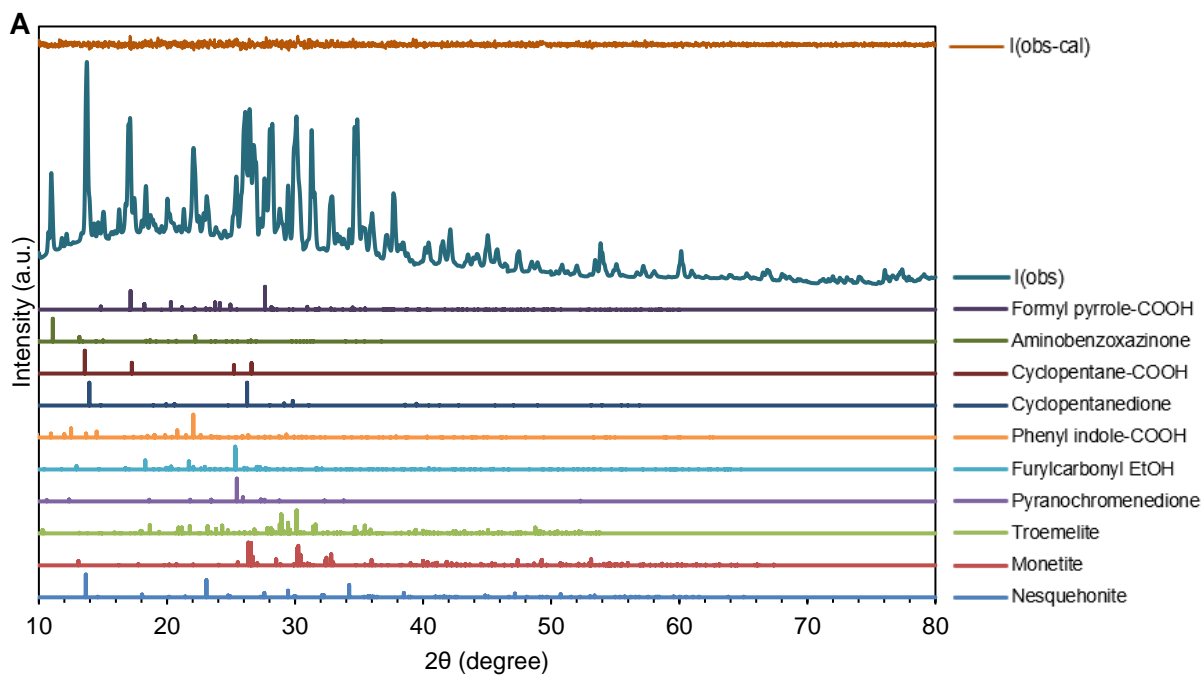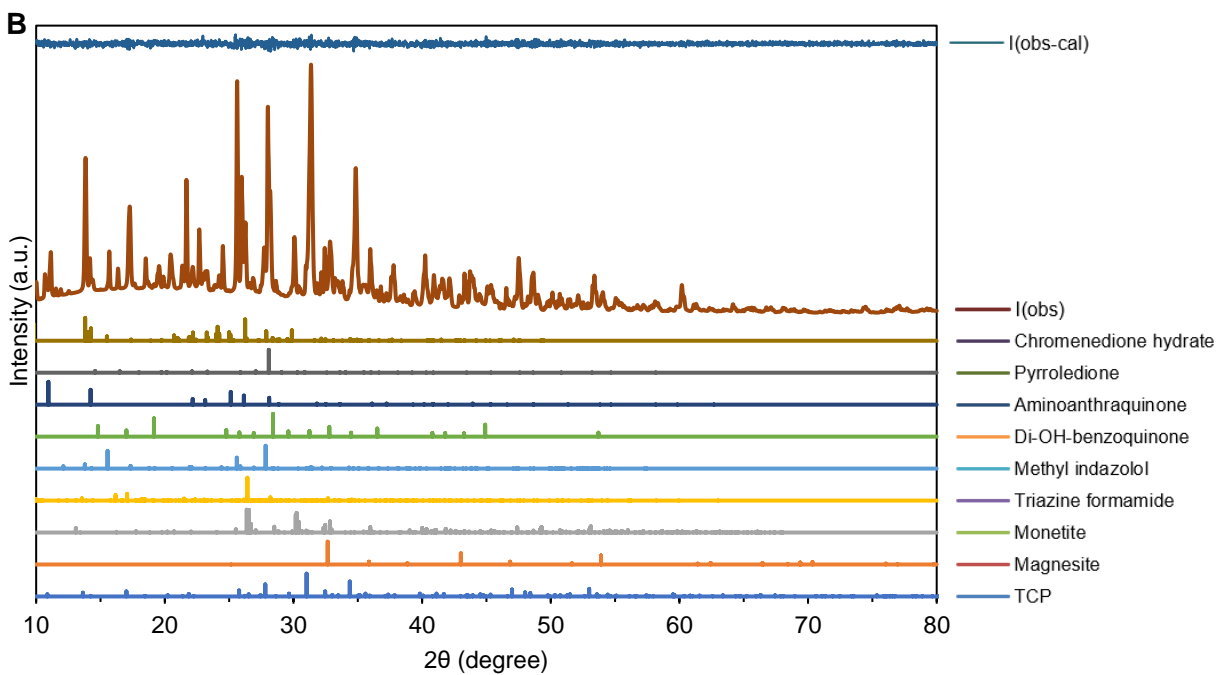

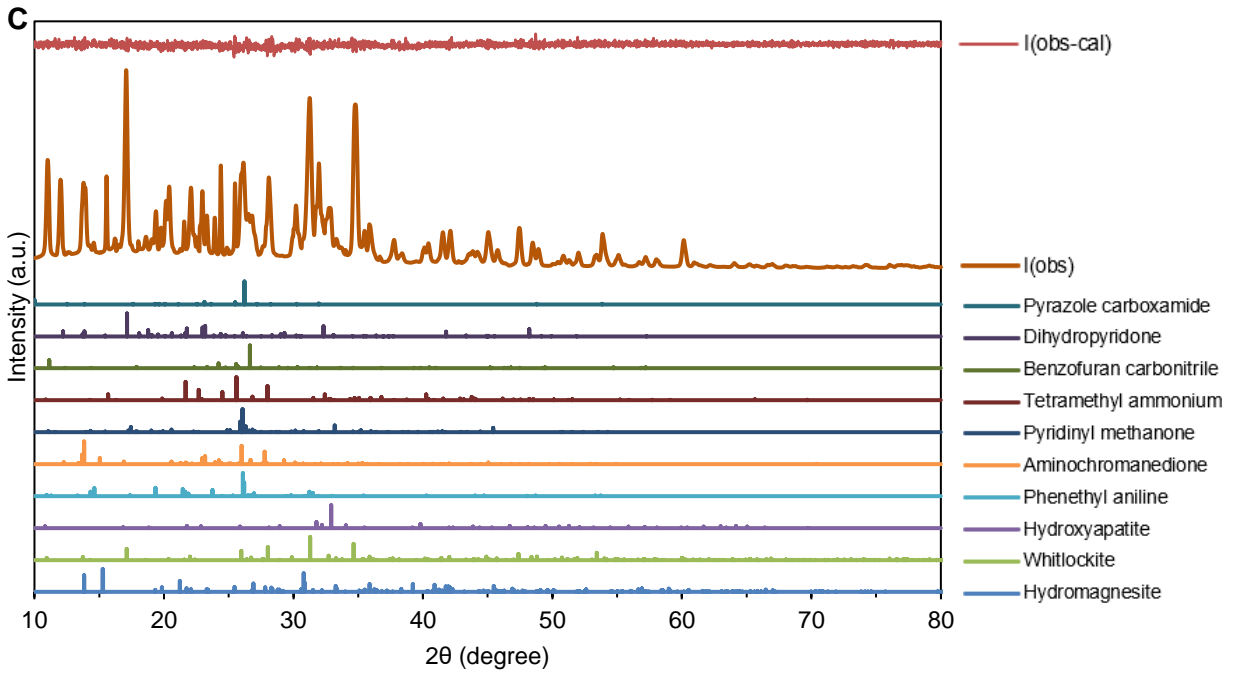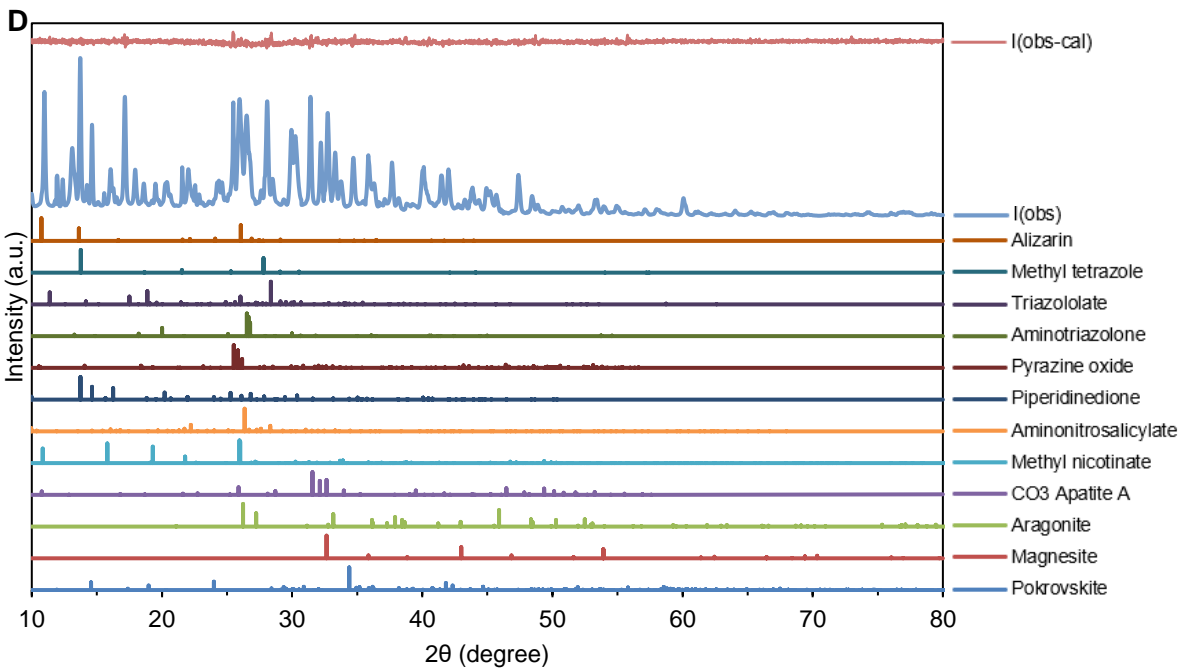

Figure S4. The DP-MAS  $^{13}\text{C}$  SS-NMR spectra of hydrochar: (a) Cel/Lig 0.2-pH 3.5-320  $^{\circ}\text{C}$ ; (b) Cel/Lig 0.2-pH 3.5-360  $^{\circ}\text{C}$ ; (c) Cel/Lig 0.2-pH 8-320  $^{\circ}\text{C}$ ; (d) Cel/Lig 0.2-pH 8-360  $^{\circ}\text{C}$ , (e) Cel/Lig 1.8-pH 3.5-320  $^{\circ}\text{C}$ , (f) Cel/Lig 1.8-pH 3.5-360  $^{\circ}\text{C}$ ; (g) Cel/Lig 1.8-pH 3.5-360  $^{\circ}\text{C}$  and (h) Cel/Lig 1.8-pH 8-360  $^{\circ}\text{C}$ .

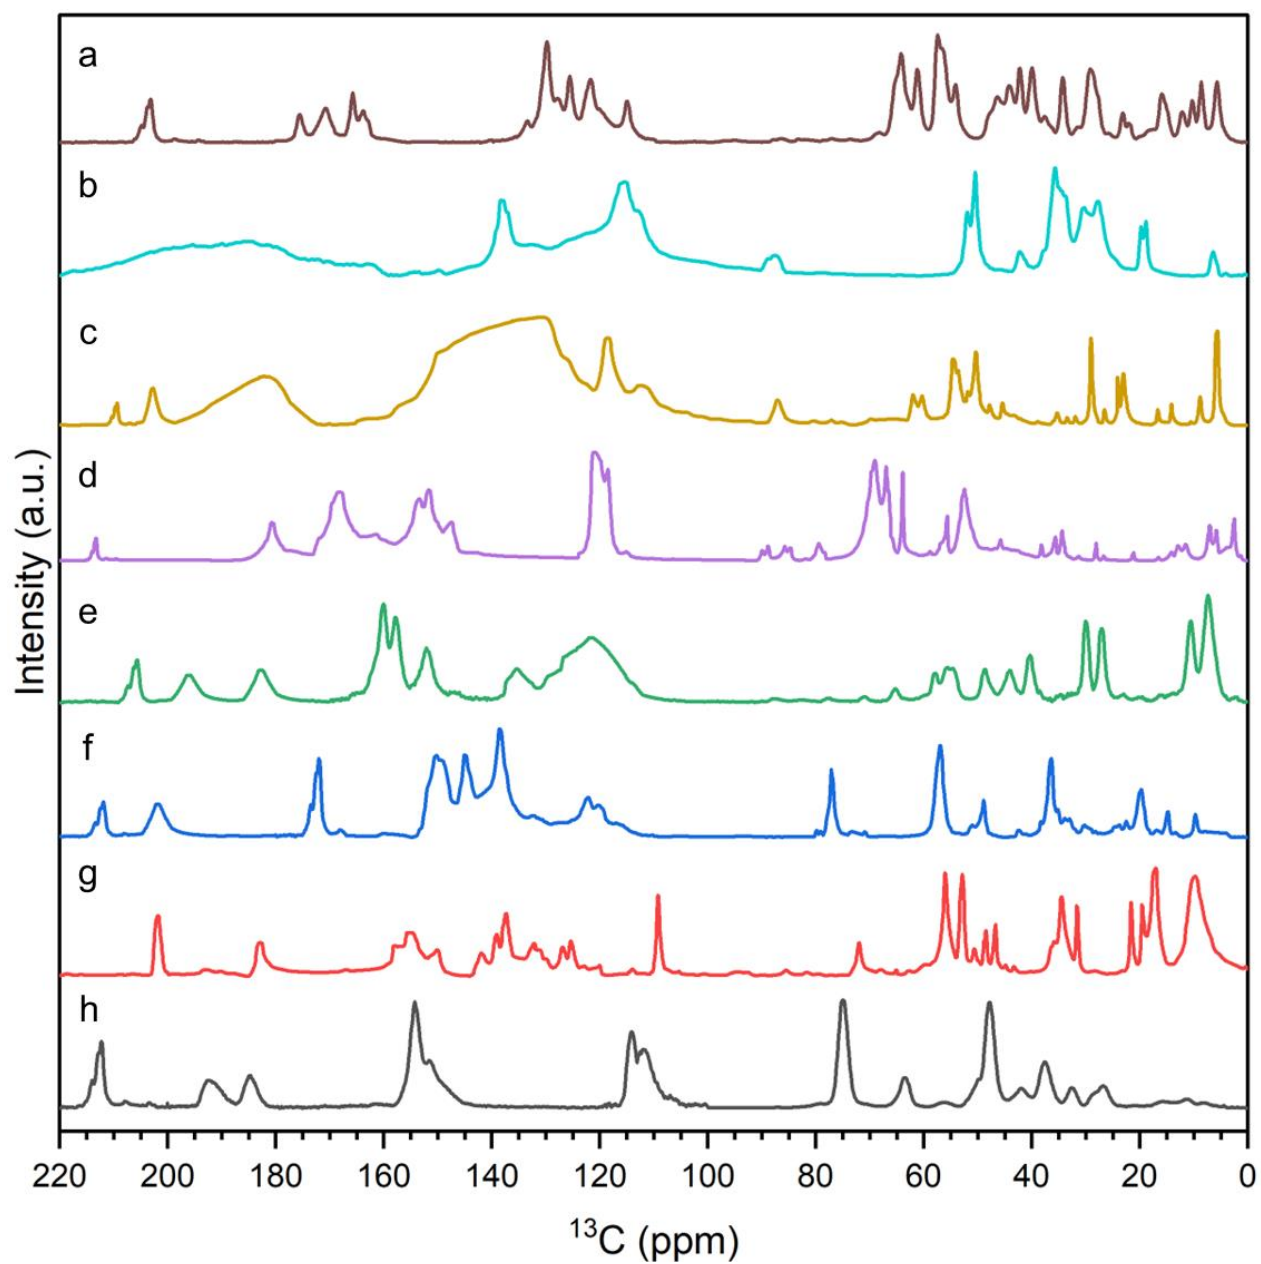

Figure S5. The  $^{13}\text{C}$  NMR spectra of biocrude oil: (a) Cel/Lig 0.2-pH 3.5-320  $^{\circ}\text{C}$ ; (b) Cel/Lig 0.2-pH 3.5-360  $^{\circ}\text{C}$ ; (c) Cel/Lig 0.2-pH 8-320  $^{\circ}\text{C}$ ; (d) Cel/Lig 0.2-pH 8-360  $^{\circ}\text{C}$ , (e) Cel/Lig 1.8-pH 3.5-320  $^{\circ}\text{C}$ , (f) Cel/Lig 1.8-pH 3.5-360  $^{\circ}\text{C}$ ; (g) Cel/Lig 1.8-pH 8-360  $^{\circ}\text{C}$  and (h) Cel/Lig 1.8-pH 8-360  $^{\circ}\text{C}$ .

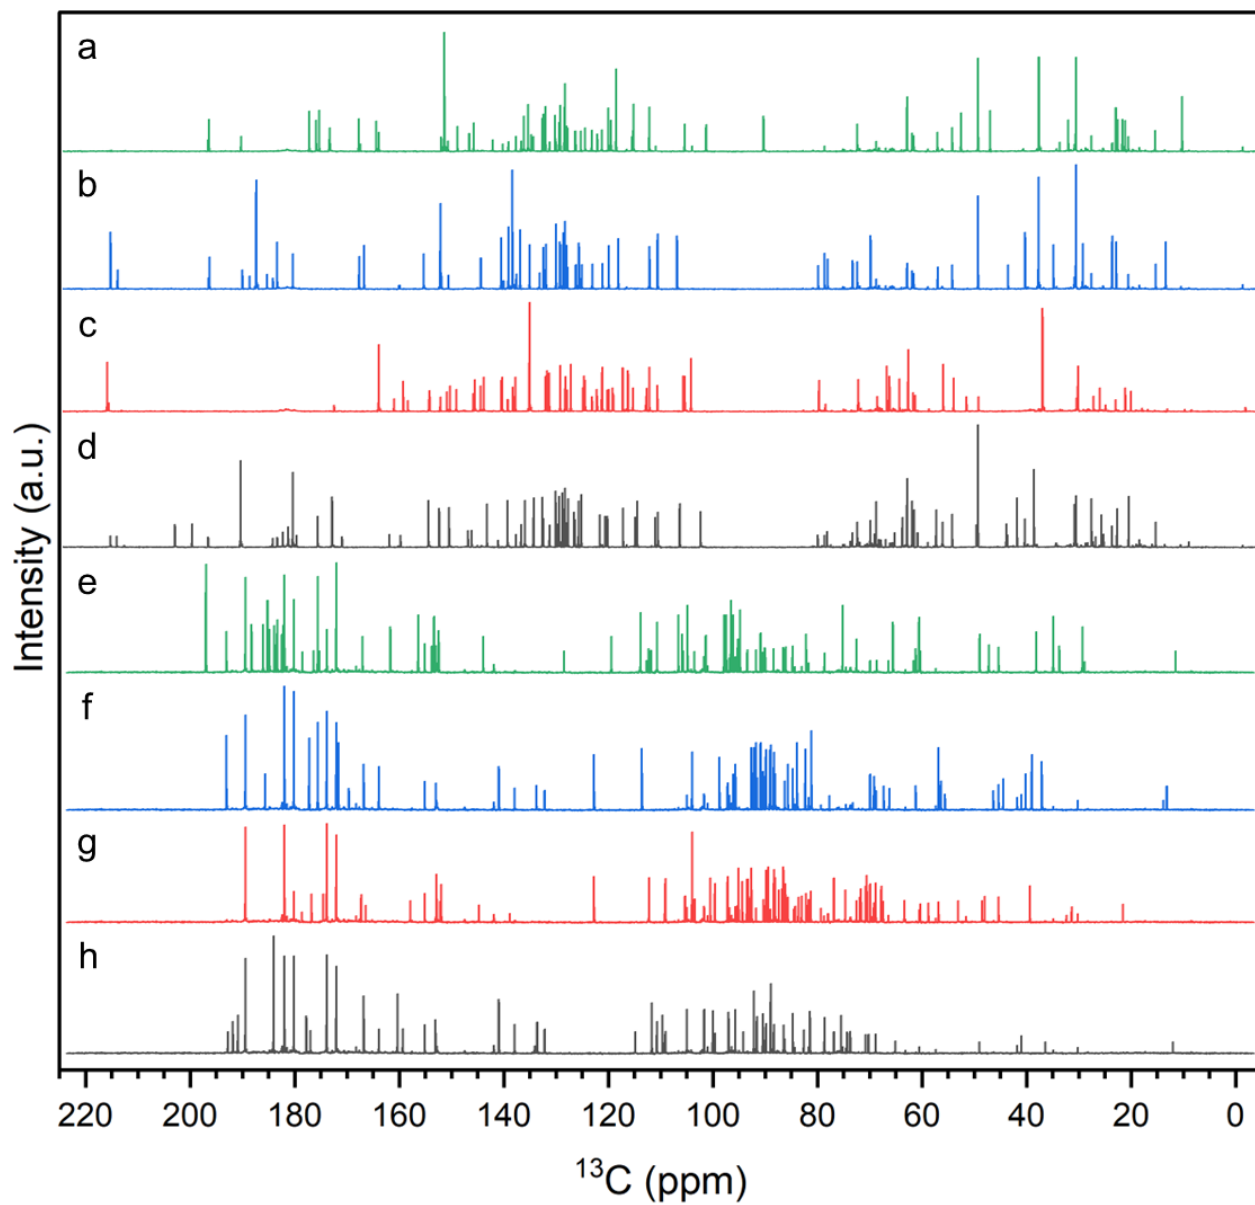



Figure S6. The  $^{13}\text{C}$  NMR spectra of aqueous-phase coproduct: (a) Cel/Lig 0.2-pH 3.5-320  $^{\circ}\text{C}$ ; (b) Cel/Lig 0.2-pH 3.5-360  $^{\circ}\text{C}$ ; (c) Cel/Lig 0.2-pH 8-320  $^{\circ}\text{C}$ ; (d) Cel/Lig 0.2-pH 8-360  $^{\circ}\text{C}$ , (e) Cel/Lig 1.8-pH 3.5-320  $^{\circ}\text{C}$ , (f) Cel/Lig 1.8-pH 3.5-360  $^{\circ}\text{C}$ ; (g) Cel/Lig 1.8-pH 3.5-360  $^{\circ}\text{C}$  and (h) Cel/Lig 1.8-pH 8-360  $^{\circ}\text{C}$ .

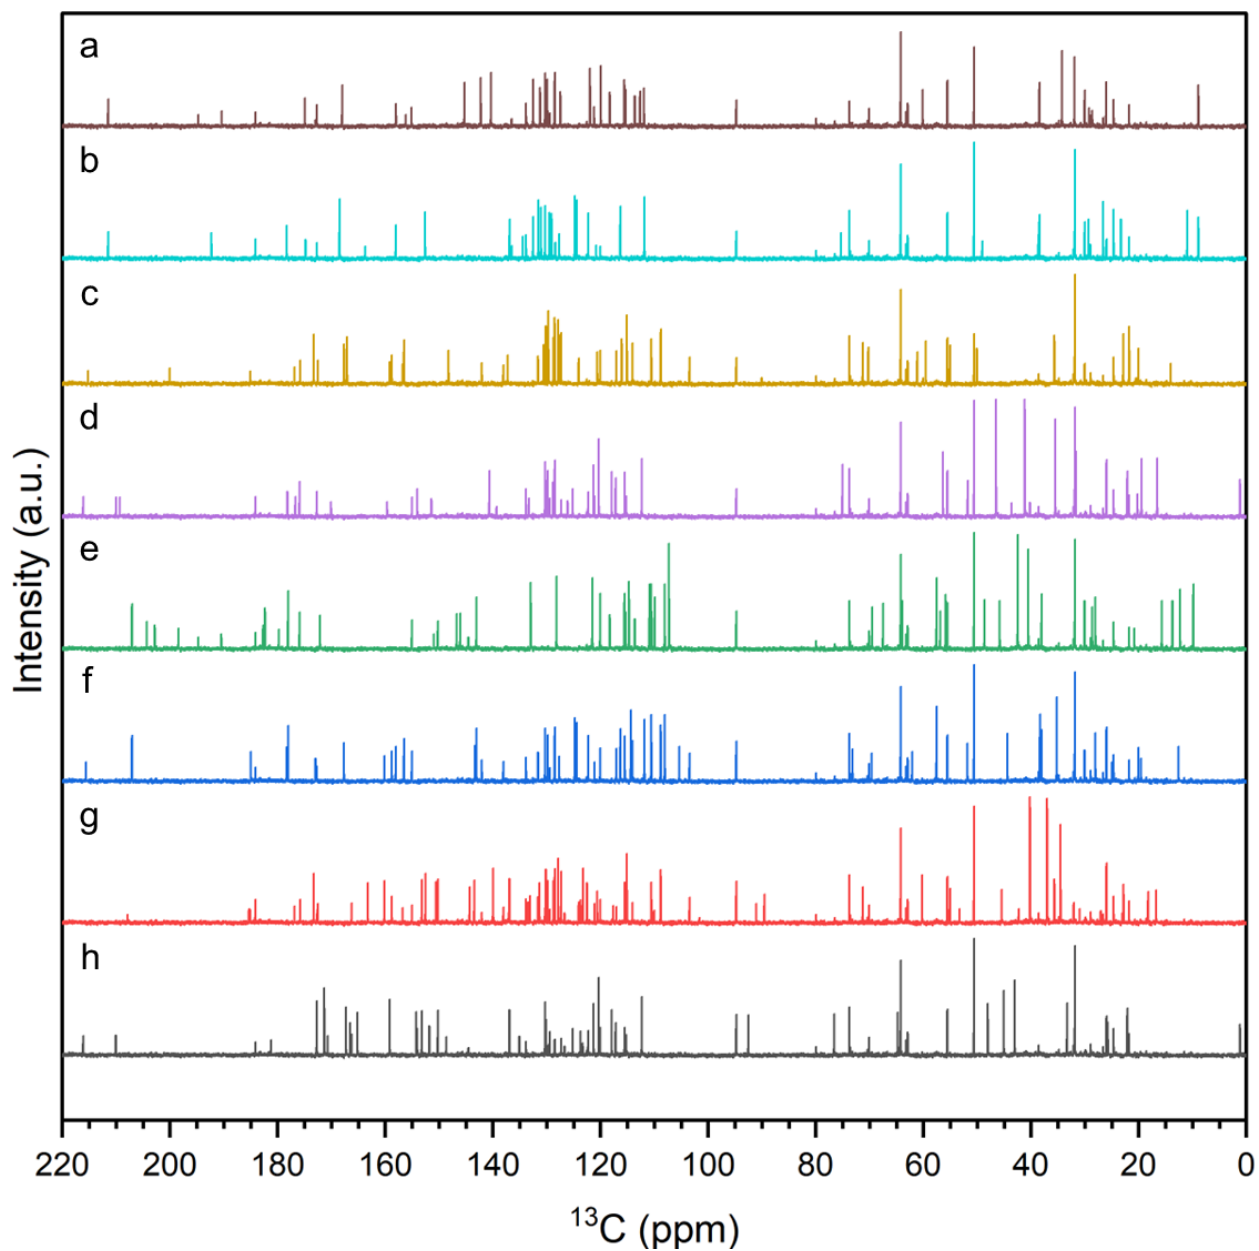

Figure S7. The  $^{31}\text{P}$  NMR spectra of aqueous-phase coproduct: (a) Cel/Lig 0.2-pH 3.5-320  $^{\circ}\text{C}$ ; (b) Cel/Lig 0.2-pH 3.5-360  $^{\circ}\text{C}$ ; (c) Cel/Lig 0.2-pH 8-320  $^{\circ}\text{C}$ ; (d) Cel/Lig 0.2-pH 8-360  $^{\circ}\text{C}$ , (e) Cel/Lig 1.8-pH 3.5-320  $^{\circ}\text{C}$ , (f) Cel/Lig 1.8-pH 3.5-360  $^{\circ}\text{C}$ ; (g) Cel/Lig 1.8-pH 3.5-360  $^{\circ}\text{C}$  and (h) Cel/Lig 1.8-pH 8-360  $^{\circ}\text{C}$ .

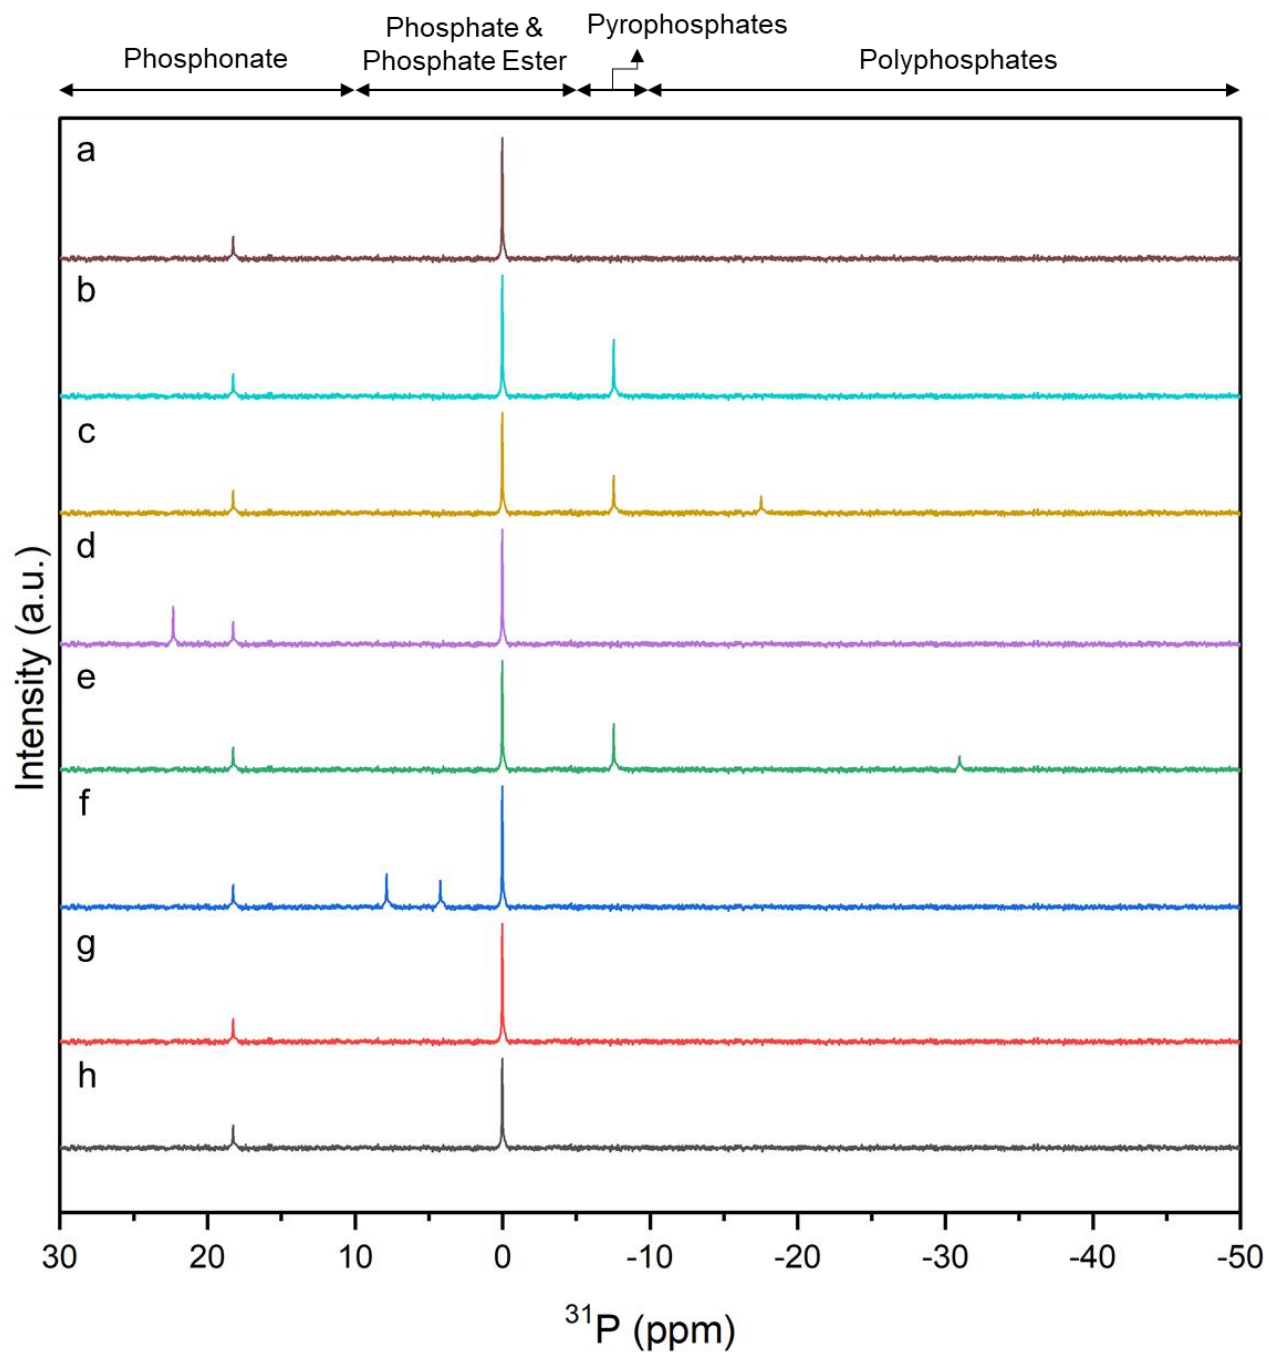

Figure S8. Solid-state NMR spectra of (a)  $^{31}\text{P}$ , (b)  $^{25}\text{Mg}$ , and (c)  $^{43}\text{Ca}$  of hydrochar produced from (1) Cel/Lig 0.2–pH 3.5–320°C; (2) Cel/Lig 0.2–pH 3.5–360°C; (3) Cel/Lig 0.2–pH 8–320°C; (4) Cel/Lig 0.2–pH 8–360°C, (5) Cel/Lig 1.8–pH 3.5–320°C, (6) Cel/Lig 1.8–pH 3.5–360°C; (7) Cel/Lig 1.8–pH 8–320°C and (8) Cel/Lig 1.8–pH 8–360°C.

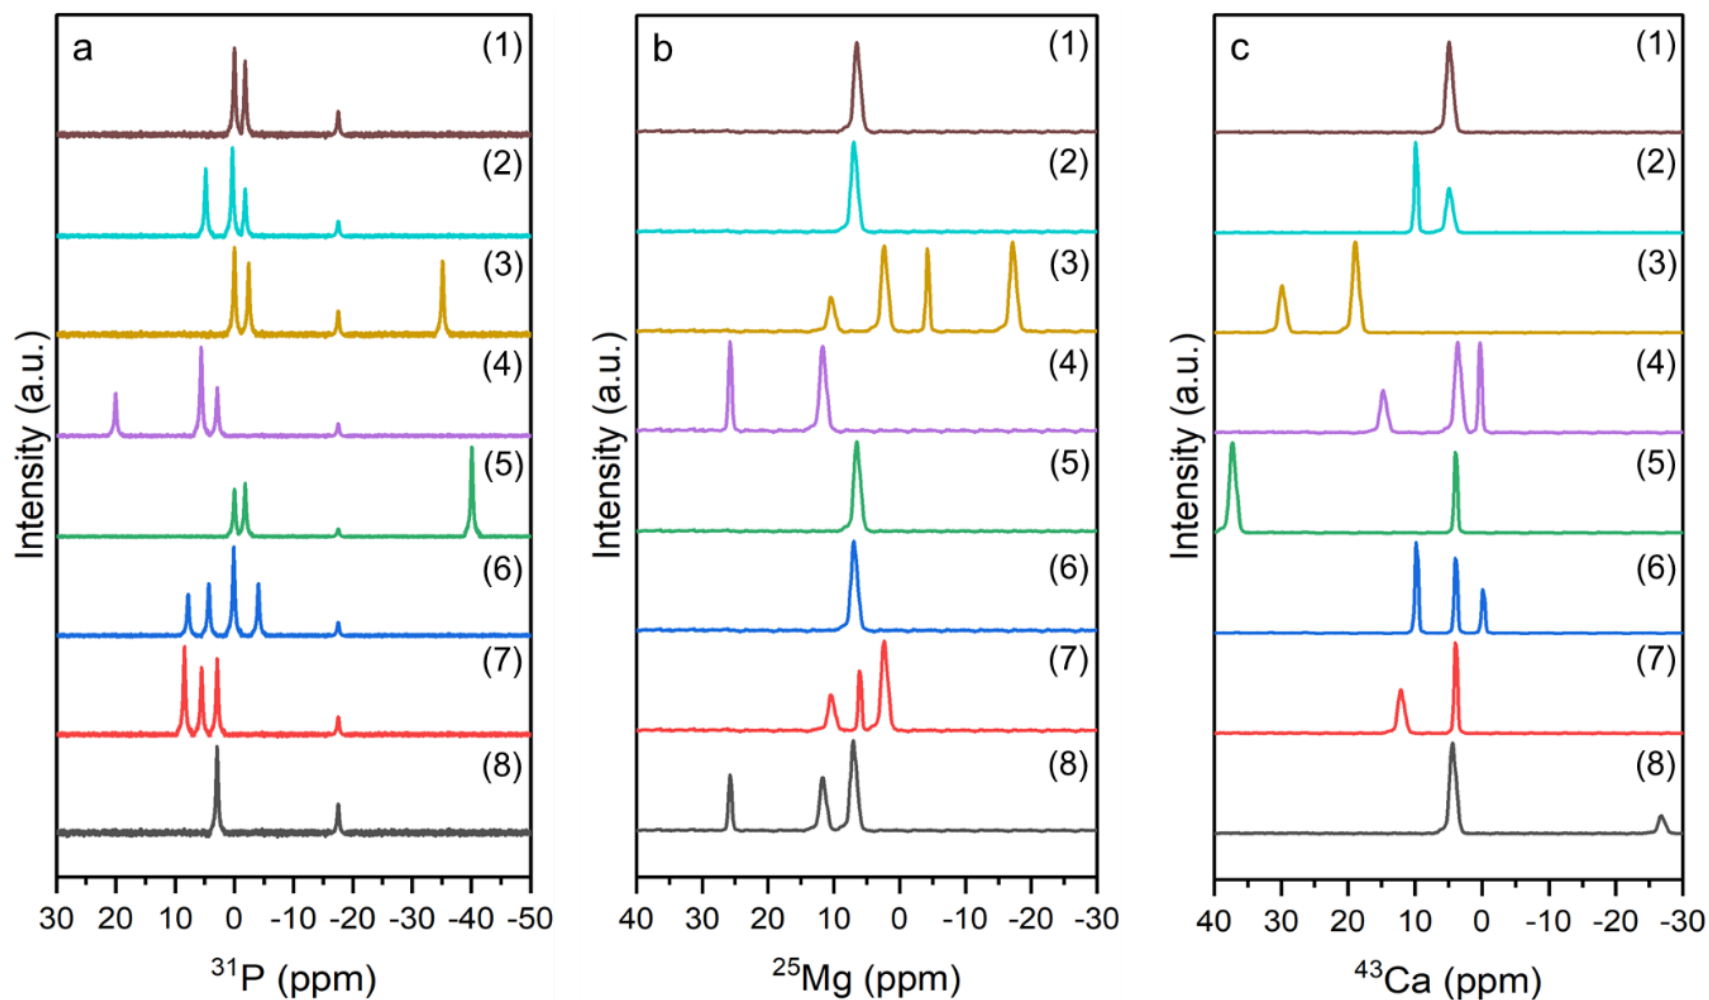

Figure S9. Product yield distribution

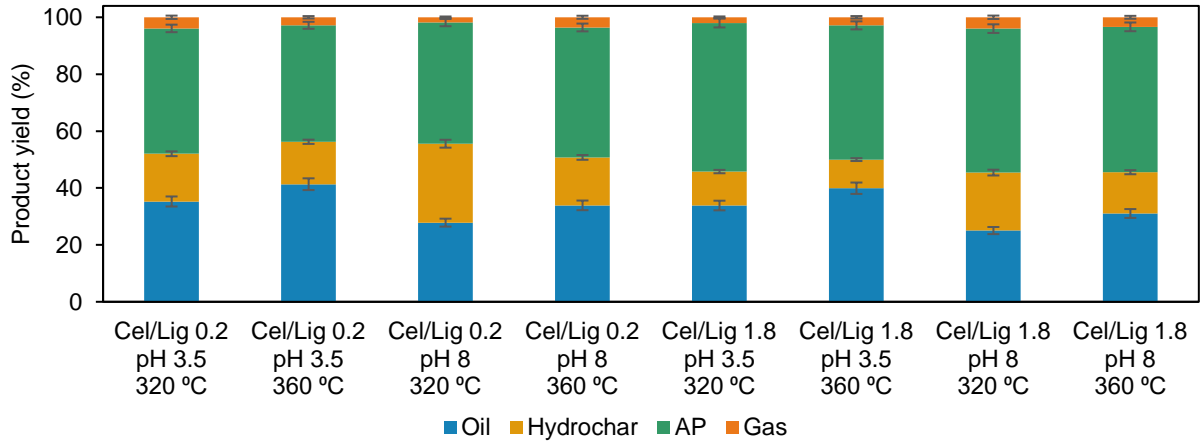

Figure S10. Carbon yield distribution

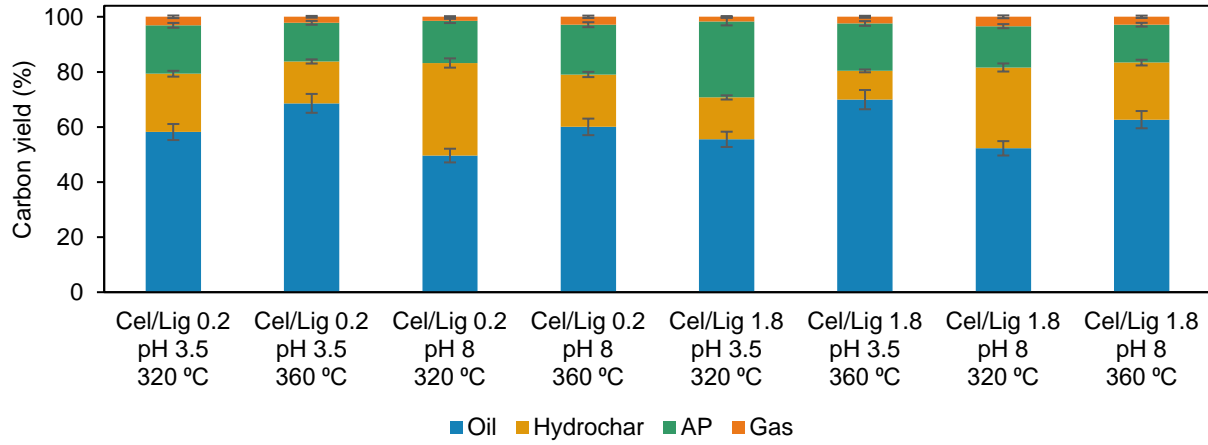

Figure S11. Nitrogen yield distribution

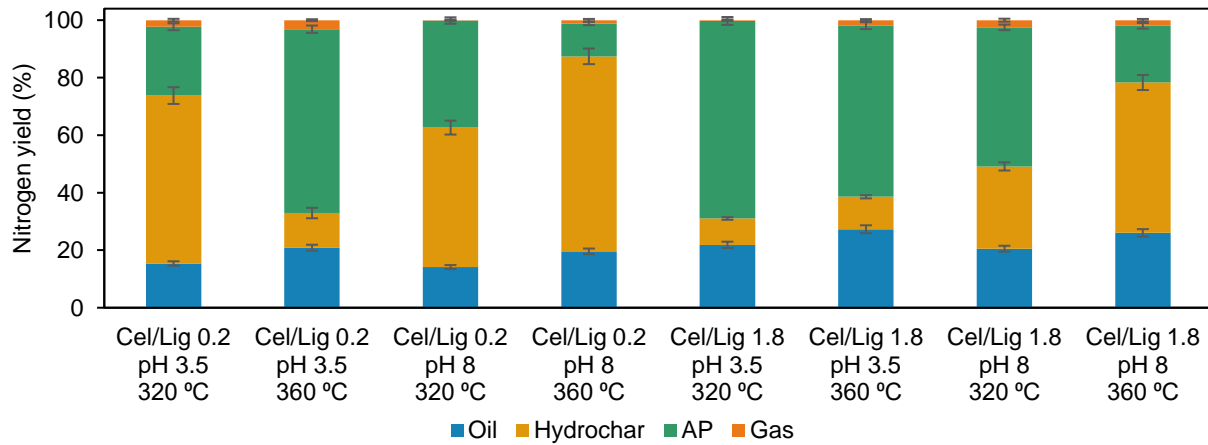

Figure S12. Phosphorus yield distribution

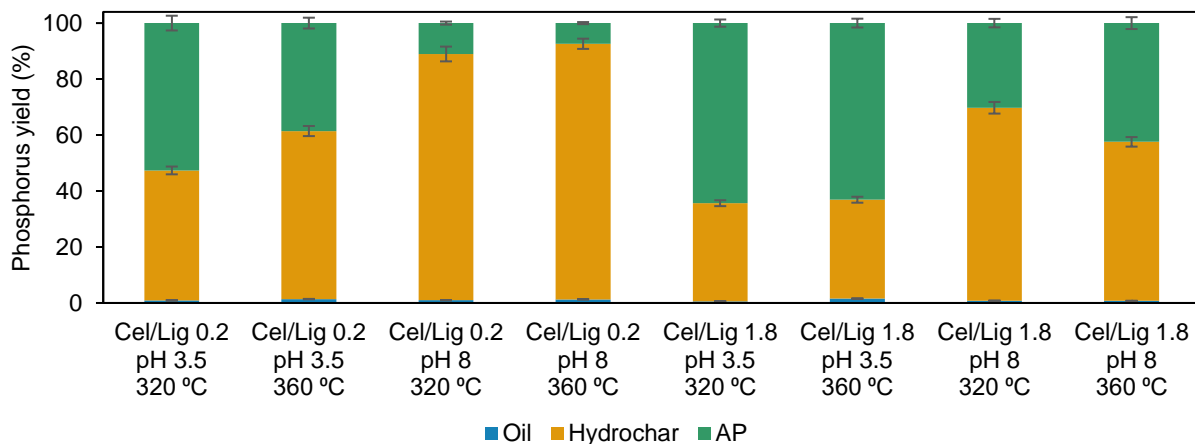

Figure S13. Calcium yield distribution

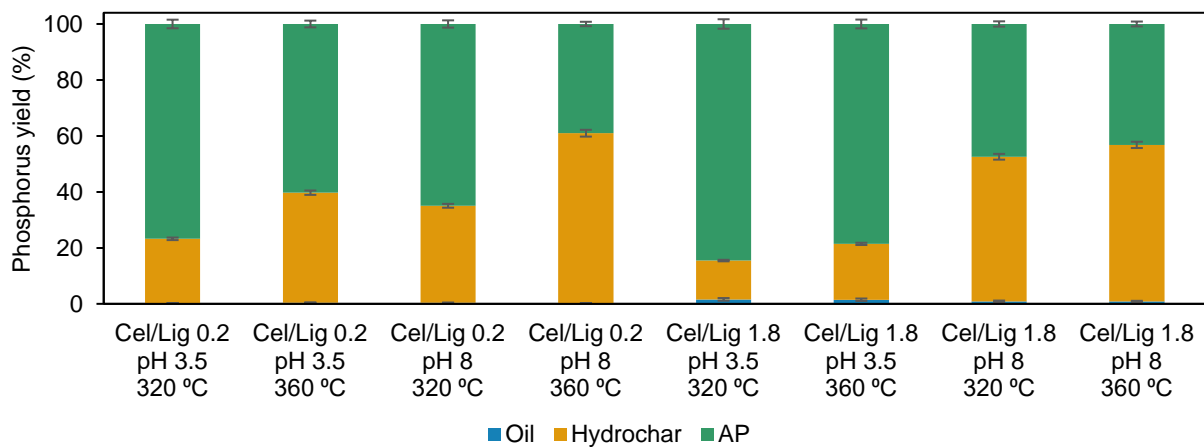

Figure S14. Magnesium yield distribution

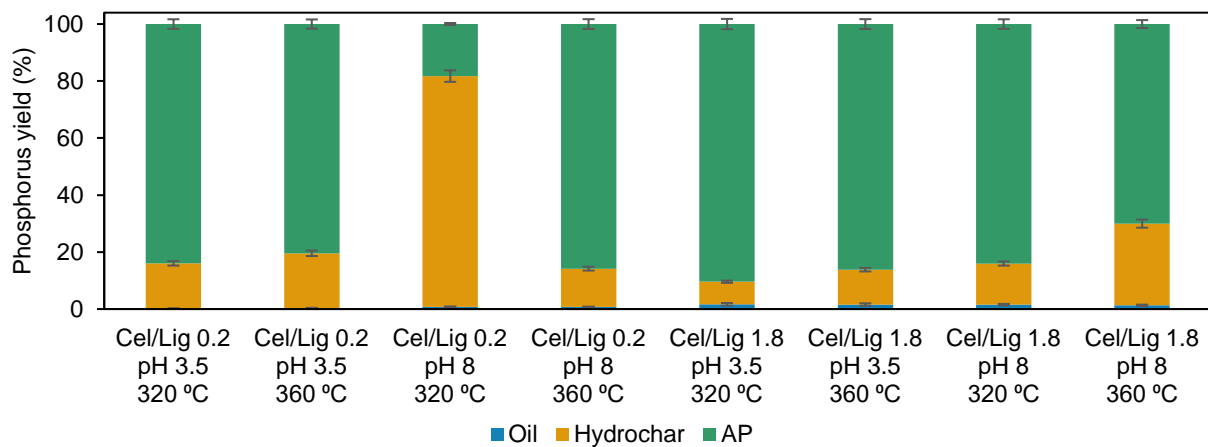

Figure S15. Percent distribution of (a)  $^{31}\text{P}$ , (b)  $^{25}\text{Mg}$ , and (c)  $^{43}\text{Ca}$  functionalities based on quantitative DP-MAS SS-NMR. Figure S8 shows the corresponding SS-NMR spectra.

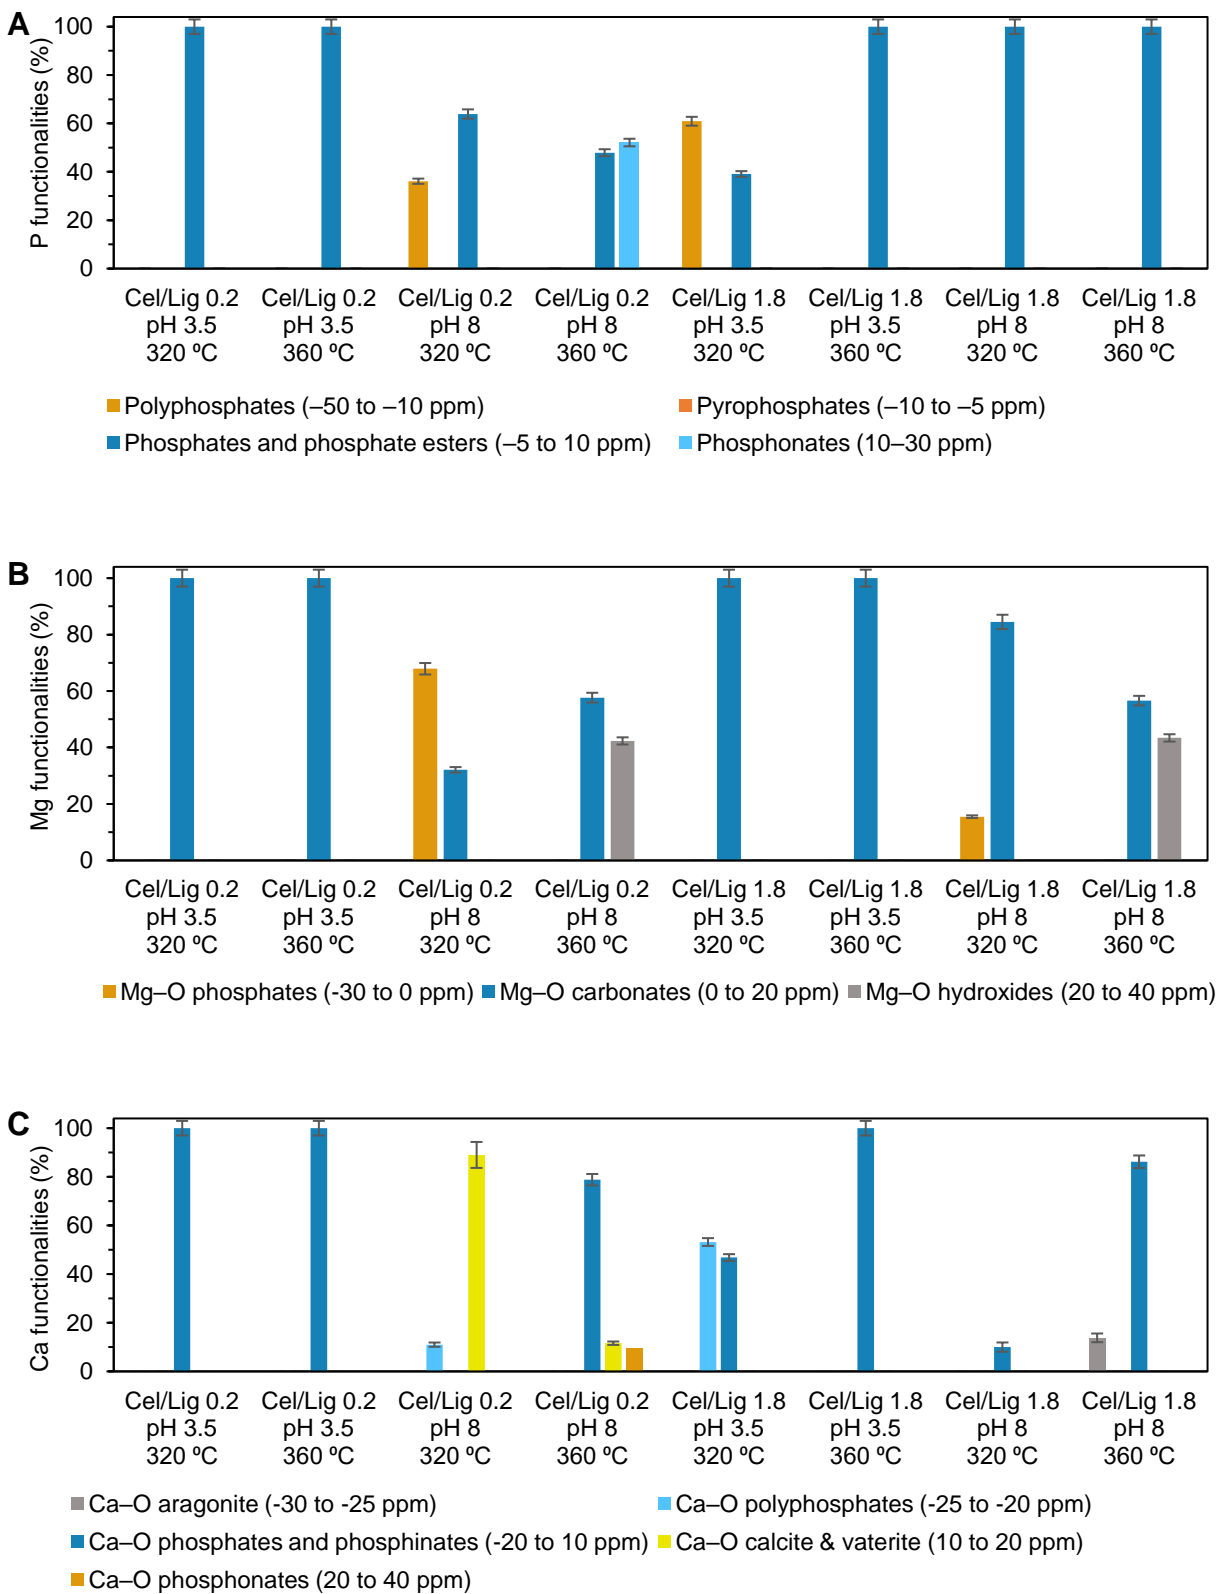

Table S1. Equation lists for product and element yields calculation.

| Parameters                                                                                                         | Equations                                                                                                                                                                                                                                                                                                                                                                                                                                                                           |
|--------------------------------------------------------------------------------------------------------------------|-------------------------------------------------------------------------------------------------------------------------------------------------------------------------------------------------------------------------------------------------------------------------------------------------------------------------------------------------------------------------------------------------------------------------------------------------------------------------------------|
| Product yield                                                                                                      | $Y_i = \frac{m_i}{m_{feedstock}} \times 100\%$ <p><math>Y</math> is the mass yield, <math>i</math> indicates biocrude or hydro-char, <math>m</math> is mass (g), and <math>m_{feedstock}</math> is the dry mass of feedstock (g).</p>                                                                                                                                                                                                                                               |
| The yield of carbon or nitrogen in the biocrude or hydrochar                                                       | $X_{yield-i} = \frac{(\%X_i) \times m_i}{X_{feedstock}} \times 100\%$ <p><math>X_{yield}</math> and <math>X_{feedstock}</math> represent the product yield and mass in the feedstock (g), respectively of carbon or nitrogen, <math>i</math> indicates biocrude or hydrochar, and <math>\%X</math> is the carbon or nitrogen content measured using Exeter Analytical CE-440.</p>                                                                                                   |
| The yield of carbon and nitrogen in the HTL-AP                                                                     | $C_{yield-AP} = \frac{[TOC]_{AP} \times (V_{AP})}{X_{feedstock}} \times 100\%$ $N_{yield-AP} = \frac{[TN]_{AP} \times (V_{AP})}{X_{feedstock}} \times 100\%$ <p><math>C_{yield-AP}</math> and <math>N_{yield-AP}</math> are the carbon and nitrogen yield, respectively, in the HTL-AP and <math>[TOC]_{AP}</math> and <math>[TN]_{AP}</math> are the total concentration of organic carbon and nitrogen (mg/L), respectively.</p>                                                  |
| The yield of carbon and nitrogen expelled to the gas phase during reaction ( $C_{yield-Gas}$ and $N_{yield-Gas}$ ) | $C_{yield-Gas} = 100\% - C_{yield-Biocrude} - C_{yield-HC} - C_{yield-AP}$ $N_{yield-Gas} = 100\% - N_{yield-Biocrude} - N_{yield-HC} - N_{yield-AP}$                                                                                                                                                                                                                                                                                                                               |
| The yield of gas and aqueous-phase coproduct                                                                       | $Y_{Gas} = \frac{44}{12} \times \frac{C_{yield-Gas} \times C_{feedstock}}{m_{feedstock}} \times 100\%$ $Y_{AP} = 100\% - Y_{Biocrude} - Y_{HC} - Y_{Gas}$                                                                                                                                                                                                                                                                                                                           |
| The yield of nutrient ( $Z$ – P, Ca, Mg, K, and Cl) in hydrochar ( $Z_{HC}$ ) and HTL-AP ( $Z_{AP}$ )              | $Z_{HC} = \frac{\%Z_{HC} \times m_{HC}}{Z_{feedstock}} \times 100\%$ $Z_{AP} = \frac{[Z]_{AP} \times V_{AP}}{Z_{feedstock}} \times 100\%$ <p><math>Z_{feedstock}</math> is the mass of <math>Z</math> in the feedstock (g), <math>V_{AP}</math> is the HTL-AP volume, and <math>m_{HC}</math> is the hydrochar mass (g), <math>\%Z_{HC}</math> is the elemental content in hydrochar, and <math>[Z]_{AP}</math> is the colorimetrically-measured nutrient concentration (mg/L).</p> |

Table S2. Operating conditions for DP-MAS solid-state NMR

| Nuclei           | Operating conditions |               |          |                      |                                                                                   |  | Reference Compounds                                                                       |
|------------------|----------------------|---------------|----------|----------------------|-----------------------------------------------------------------------------------|--|-------------------------------------------------------------------------------------------|
|                  | 90° Pulse Length     | Recycle Delay | MAS Rate | Number of transients | Proton-decoupling                                                                 |  |                                                                                           |
| <sup>13</sup> C  | 2 μs                 | 20 s          | 13 kHz   | 1024                 | Two-pulse phase-modulated proton-decoupling                                       |  | Adamantane-d <sub>16</sub> (≥ 98%, Sigma-Aldrich) with respect to tetramethylsilane (TMS) |
| <sup>31</sup> P  | 4 μs                 | 10 s          | 13 kHz   | 4096                 | Continuous heteronuclear decoupling ( <sup>31</sup> P – <sup>1</sup> H) at 80 kHz |  | Triphenyl phosphate<br>(TraceCERT, Supelco)                                               |
| <sup>25</sup> Mg | 5 μs                 | 10 s          | 13 kHz   | 3600                 | Continuous-wave (CW) proton decoupling at 42 kHz                                  |  | 1N MgCl <sub>2</sub> in D <sub>2</sub> O<br>(≥ 99%, Sigma Aldrich)                        |
| <sup>43</sup> Ca | 4 μs                 | 4 s           | 12.5 kHz | 3000                 | Spinal-64 <sup>1</sup> H decoupling at 100 kHz                                    |  | 1N CaCl <sub>2</sub> in D <sub>2</sub> O<br>(≥ 99%, Sigma Aldrich)                        |

Table S3. The colorimetric concentration of different nitrogen species in the aqueous-phase coproducts.

| HTL Operating Conditions |        |     |           |         | Nitrogen Species            |                          |                                       |                                       |                                        |                      |
|--------------------------|--------|-----|-----------|---------|-----------------------------|--------------------------|---------------------------------------|---------------------------------------|----------------------------------------|----------------------|
| T, °C                    | t, min | pH  | Salt, wt% | Cel/Lig | N <sub>organic</sub> , mg/l | NH <sub>3</sub> -N, mg/l | NO <sub>2</sub> <sup>-</sup> -N, mg/l | NO <sub>3</sub> <sup>-</sup> -N, mg/l | N <sub>2</sub> H <sub>4</sub> -N, mg/l | Total Nitrogen, mg/l |
| 320                      | 50     | 3.5 | 5         | 0.2     | 383.6                       | 751.1                    | 1.16                                  | 10.4                                  | 9.2                                    | 1155.6               |
| 360                      | 50     | 3.5 | 5         | 0.2     | 1024.6                      | 2006.0                   | 3.09                                  | 27.8                                  | 24.7                                   | 3086.2               |
| 320                      | 50     | 8   | 5         | 0.2     | 596.6                       | 1168.0                   | 1.80                                  | 16.2                                  | 14.4                                   | 1796.9               |
| 360                      | 50     | 8   | 5         | 0.2     | 182.8                       | 357.9                    | 0.55                                  | 5.0                                   | 4.4                                    | 550.7                |
| 320                      | 50     | 3.5 | 5         | 1.8     | 1100.6                      | 2154.9                   | 3.32                                  | 29.8                                  | 26.5                                   | 3315.2               |
| 360                      | 50     | 3.5 | 5         | 1.8     | 953.6                       | 1867.0                   | 2.87                                  | 25.9                                  | 23.0                                   | 2872.3               |
| 320                      | 50     | 8   | 5         | 1.8     | 775.1                       | 1517.6                   | 2.33                                  | 21.0                                  | 18.7                                   | 2334.8               |
| 360                      | 50     | 8   | 5         | 1.8     | 316.0                       | 618.6                    | 0.95                                  | 8.6                                   | 7.6                                    | 951.7                |



Table S4. The WPF and Rietveld refinement results for diffractograms of hydrochar produced from the HTL of digestates.

| Operating Conditions            | PDF ID       | Detected Organic/Mineral Phases                                                 | Composition (wt%) | $R_{Bragg}$ (%) | $R_{WPF}$ (%) | Crystallinity |
|---------------------------------|--------------|---------------------------------------------------------------------------------|-------------------|-----------------|---------------|---------------|
| Cel/Lig 0.2<br>pH 3.5<br>320 °C | 00-053-1717  | Polyaniline                                                                     | 15.4 ± 1.1        | 6.34            | 10.14         | 75.93         |
|                                 | 00-059-1090  | 1,2-Bis(2,6-dichlorobenzylidene)hydrazine                                       | 3.6 ± 0.6         | 7.28            |               |               |
|                                 | 00-055-1744  | Ethyl-1',3',3'-trimethyl-8-nitrospiro[chromene-2,2'-indoline]-5'-carboxylate    | 7.1 ± 0.3         | 8.55            |               |               |
|                                 | 00-055-1827  | Indole-2-carboxylic acid 3,5-dinitrobenzoic acid                                | 8.5 ± 1.8         | 5.72            |               |               |
|                                 | 00-054-2291  | 3,5-Diamino-1H-1,2,4-triazole                                                   | 2.7 ± 0.6         | 6.06            |               |               |
|                                 | 00-051-2369  | 3-Amino-4-(3-methoxyphenyl)-3,4,7,8-tetrahydro-2H-benzo[e][1,2]oxazin-6(5H)-one | 4.5 ± 0.4         | 9.11            |               |               |
|                                 | 00-054-1622  | 2-(4-Hydroxyphenyl)acetonitrile                                                 | 8.9 ± 0.9         | 8.35            |               |               |
|                                 | 00-015-0973  | <i>N,N</i> -dimethyl-4-nitroaniline                                             | 19.8 ± 0.4        | 8.06            |               |               |
|                                 | 00-009-0080  | Monetite                                                                        | 17.2 ± 1.4        | 5.69            |               |               |
| 00-020-0669                     | Nesquehonite | 12.2 ± 0.3                                                                      | 6.99              |                 |               |               |
| Cel/Lig 0.2<br>pH 3.5<br>360 °C | 00-048-2341  | 2-Aminoanthraquinone                                                            | 7.2 ± 0.6         | 10.02           | 11.64         | 80.16         |
|                                 | 00-062-1376  | 1-(Anthracen-9-yl)- <i>N</i> -(phenylmethyl)methanaminium chloride              | 10 ± 0.2          | 9.57            |               |               |
|                                 | 00-046-1758  | 2,5-Dihydroxy- <i>p</i> -benzoquinone                                           | 21.4 ± 0.7        | 8.75            |               |               |
|                                 | 00-055-1744  | Ethyl-1',3',3'-trimethyl-8-nitrospiro[chromene-2,2'-indoline]-5'-carboxylate    | 4.9 ± 0.5         | 8.04            |               |               |
|                                 | 00-037-1955  | 1 <i>H</i> -Indoline-2,3-dione                                                  | 12.9 ± 1.0        | 7.11            |               |               |
|                                 | 00-043-1767  | ( <i>E</i> )-1,2-dichloro-1,2-bis(5-phenyloxazol-2-yl)ethene                    | 3 ± 0.8           | 5.67            |               |               |
|                                 | 00-009-0080  | Monetite                                                                        | 9.7 ± 0.3         | 6.16            |               |               |
|                                 | 01-086-0175  | Magnesite                                                                       | 11 ± 0.4          | 6.36            |               |               |
|                                 | 00-055-0898  | β-Tricalcium phosphate                                                          | 19.9 ± 0.8        | 7.25            |               |               |
| Cel/Lig 0.2<br>pH 8<br>320 °C   | 00-062-1368  | 5,6-Dimethoxy-2-(2-methoxyphenyl)benzofuran-3-carbonitrile                      | 13.8 ± 0.6        | 9.46            | 12.07         | 82.86         |
|                                 | 00-059-1090  | 1,2-Bis(2,6-dichlorobenzylidene)hydrazine                                       | 4.6 ± 0.2         | 7.37            |               |               |

| Operating Conditions            | PDF ID                        | Detected Organic/Mineral Phases                                                                                                | Composition (wt%)          | $R_{Bragg}$ (%) | $R_{WP}$ (%) | Crystallinity |
|---------------------------------|-------------------------------|--------------------------------------------------------------------------------------------------------------------------------|----------------------------|-----------------|--------------|---------------|
|                                 | 00-038-1730                   | Tetramethylammonium hydroxide pentahydrate                                                                                     | $3.8 \pm 0.1$              | 7.05            |              |               |
|                                 | 00-059-1064                   | 4-(4-(2-(2,4-dinitrophenoxy)-ethoxy)-3-methoxy-benzylidene-amino)-1,5-dimethyl-2-phenyl-1 <i>H</i> -pyrazol-3(2 <i>H</i> )-one | $18.2 \pm 0.9$             | 8.18            |              |               |
|                                 | 00-062-1046                   | 2-(2,4-dichlorophenoxy)- <i>N</i> -(3,4-dichlorophenyl)acetamide                                                               | $3.7 \pm 0.5$              | 7.28            |              |               |
|                                 | 00-068-1289                   | ( <i>Z</i> )-3-(1-((4-hydroxyphenyl)amino)-ethylidene)chromane-2,4-dione                                                       | $19.2 \pm 0.3$             | 6.82            |              |               |
|                                 | 00-046-1716                   | Calcium ethylenediammonium cyclotetraphosphate dihydrate                                                                       | $5.5 \pm 0.6$              | 8.58            |              |               |
|                                 | 01-072-1358                   | Hydroxyl wagnerite                                                                                                             | $14.1 \pm 0.7$             | 8.19            |              |               |
|                                 | 01-086-4272                   | Calcite                                                                                                                        | $9.6 \pm 0.3$              | 5.96            |              |               |
|                                 | 00-025-0531                   | Hydromagnesite                                                                                                                 | $7.5 \pm 0.4$              | 5.89            |              |               |
|                                 | Cel/Lig 0.2<br>pH 8<br>360 °C | 00-014-0887                                                                                                                    | 1,2-Dihydroxyanthraquinone | $23.4 \pm 0.4$  | 10.49        |               |
| 00-054-2290                     |                               | 5-Methyl-1 <i>H</i> -tetrazole                                                                                                 | $3.9 \pm 0.5$              | 7.56            |              |               |
| 00-055-1762                     |                               | Ethene-1,1-diaminium 3-nitro-1 <i>H</i> -1,2,4-triazol-5-olate                                                                 | $6.1 \pm 0.3$              | 8.44            |              |               |
| 00-055-1773                     |                               | 5-Amino-3 <i>H</i> -1,2,4-triazol-3-one                                                                                        | $6.2 \pm 0.6$              | 8.39            |              |               |
| 00-054-2339                     |                               | 3-(2,4,5-Trichlorophenoxy)propanoic acid                                                                                       | $8.4 \pm 0.4$              | 6.46            |              |               |
| 00-056-1803                     |                               | Bis(2-ammonioethyl)ammonium 5-nitrosalicylate                                                                                  | $4.7 \pm 0.3$              | 7.05            | 10.38        | 86.35         |
| 00-058-1458                     |                               | 2-Hydroxy-3-methyl- <i>N</i> -phenethylbutanamide                                                                              | $7.8 \pm 0.2$              | 6.84            |              |               |
| 00-069-0021                     |                               | Hydroxyapatite methyl phosphonic dichloride                                                                                    | $15.6 \pm 1.3$             | 9.48            |              |               |
| 00-066-0885                     |                               | A-type carbonated apatite                                                                                                      | $16 \pm 0.5$               | 10.15           |              |               |
| 01-075-8878                     |                               | Pokrovskite                                                                                                                    | $4.4 \pm 0.3$              | 7.11            |              |               |
| 01-081-2503                     |                               | Vaterite                                                                                                                       | $3.5 \pm 0.3$              | 6.78            |              |               |
| Cel/Lig 1.8<br>pH 3.5<br>320 °C | 00-067-1136                   | 5-Formyl-1 <i>H</i> -pyrrole-2-carboxylic acid                                                                                 | $10.7 \pm 0.5$             | 7.80            |              |               |
|                                 | 00-051-2369                   | 3-Amino-4-(3-methoxyphenyl)-3,4,7,8-tetrahydro-2 <i>H</i> -benzo[ <i>e</i> ][1,2]oxazin-6(5 <i>H</i> )-one                     | $7.5 \pm 0.3$              | 8.15            |              |               |
|                                 | 00-048-2136                   | 3-(4-Methoxy-3-nitrobenzoyl)-1,2,2-trimethyl-cyclopentane-1-carboxylic acid                                                    | $9.1 \pm 0.4$              | 6.94            | 12.95        | 74.05         |
|                                 | 00-043-1642                   | 2-Methyl-cyclopentane-1,3-dione                                                                                                | $11.9 \pm 0.9$             | 7.23            |              |               |

| Operating Conditions            | PDF ID      | Detected Organic/Mineral Phases                                             | Composition (wt%) | $R_{Bragg}$ (%) | $R_{WP}$ (%) | Crystallinity |
|---------------------------------|-------------|-----------------------------------------------------------------------------|-------------------|-----------------|--------------|---------------|
|                                 | 00-069-1416 | 6-Methoxy-1-(2-oxo-1-phenylethyl)-1H-indole-2-carboxylic acid               | $10.9 \pm 1.1$    | 8.23            |              |               |
|                                 | 00-056-1846 | 1-(2,4-Dichlorophenyl)-2-(2-furylcarbonyl)ethanol                           | $6.7 \pm 0.3$     | 9.55            |              |               |
|                                 | 00-051-2327 | 5-Hydroxy-4,8-dimethyl-4a,10a-dihydro-2H,6H-pyrano[3,2-g]chromen-2-one      | $16.1 \pm 0.2$    | 6.03            |              |               |
|                                 | 01-076-4509 | Troemelite                                                                  | $10.1 \pm 0.8$    | 9.16            |              |               |
|                                 | 00-009-0080 | Monetite                                                                    | $7.5 \pm 0.5$     | 6.16            |              |               |
|                                 | 00-020-0669 | Nesquehonite                                                                | $9.4 \pm 0.1$     | 5.79            |              |               |
| Cel/Lig 1.8<br>pH 3.5<br>360 °C | 00-068-1288 | (Z)-3-(1-((4-hydroxyphenyl)amino)ethylidene)chromene-2,4-dione hydrate      | $10 \pm 0.2$      | 5.70            |              |               |
|                                 | 00-050-2384 | 1H-Pyrrole-2,5-dione                                                        | $5 \pm 0.1$       | 5.93            |              |               |
|                                 | 00-048-2341 | 2-Aminoanthraquinone                                                        | $14.1 \pm 0.7$    | 8.09            |              |               |
|                                 | 00-046-1758 | 2,5-Dihydroxy-p-benzoquinone                                                | $18.8 \pm 0.9$    | 5.78            |              |               |
|                                 | 00-044-1802 | 3-Methyl-2,3-dihydro-1H-indazol-3-ol                                        | $10.2 \pm 0.3$    | 5.98            |              |               |
|                                 | 00-060-1457 | 6-(2,3-Dichlorophenyl)-1,2,4-triazine-3,5-diamine dimethylformamide solvate | $3.5 \pm 0.2$     | 6.04            | 10.96        | 91.82         |
|                                 | 00-025-1569 | Calcium phosphinate acetylenedicarboxylate decahydrate                      | $5.7 \pm 0.3$     | 9.26            |              |               |
|                                 | 00-009-0080 | Monetite                                                                    | $8.8 \pm 0.4$     | 8.76            |              |               |
|                                 | 01-086-0175 | Magnesite                                                                   | $10.9 \pm 0.6$    | 7.15            |              |               |
|                                 | 00-055-0898 | $\beta$ -TCP                                                                | $12.9 \pm 0.5$    | 7.01            |              |               |
| Cel/Lig 1.8<br>pH 3.5<br>360 °C | 00-057-1224 | 3-Methyl-5-phenoxy-1H-pyrazole-4-carboxamide                                | $9.7 \pm 0.5$     | 10.09           |              |               |
|                                 | 00-048-2414 | 1-Methyl-4,5-diphenyl-3,4-dihydropyridin-2(1H)-one                          | $22.3 \pm 1.5$    | 7.69            |              |               |
|                                 | 00-062-1368 | 5,6-Dimethoxy-2-(2-methoxyphenyl)benzofuran-3-carbonitrile                  | $8.3 \pm 0.3$     | 5.81            | 10.86        | 85.47         |
|                                 | 00-038-1730 | Tetramethylammonium hydroxide pentahydrate                                  | $2.7 \pm 0.1$     | 6.01            |              |               |
|                                 | 00-053-1398 | (5-chloro-2-nitrophenyl)( $\lambda^1$ -oxidaneyl)methanone·(4-              | $11.3 \pm 0.4$    | 6.64            |              |               |

| Operating Conditions          | PDF ID      | Detected Organic/Mineral Phases                                                                          | Composition (wt%) | $R_{Bragg}$ (%) | $R_{WP}$ (%) | Crystallinity |
|-------------------------------|-------------|----------------------------------------------------------------------------------------------------------|-------------------|-----------------|--------------|---------------|
| Cel/Lig 1.8<br>pH 8<br>360 °C | 00-068-1289 | methoxyphenyl)(pyridin-4-yl)methanone<br>(Z)-3-(1-((4-hydroxyphenyl)amino)-ethylidene)chromane-2,4-dione | 6.6 ± 0.3         | 5.74            |              |               |
|                               | 00-047-2253 | 4-(4-methoxy-2-methylphenethyl)aniline                                                                   | 9.0 ± 0.1         | 7.94            |              |               |
|                               | 00-055-0592 | Hydroxyapatite                                                                                           | 14.7 ± 0.4        | 10.83           |              |               |
|                               | 01-070-2064 | Whitlockite                                                                                              | 10.2 ± 0.2        | 9.85            |              |               |
|                               | 00-025-0531 | Hydromagnesite                                                                                           | 5.2 ± 0.2         | 5.95            |              |               |
|                               | 00-014-0887 | 1,2-Dihydroxyanthraquinone                                                                               | 16.1 ± 0.4        | 6.04            |              |               |
|                               | 00-054-2290 | 5-Methyl-1H-tetrazole                                                                                    | 1.9 ± 0.1         | 5.73            |              |               |
|                               | 00-055-1762 | Ethene-1,1-diaminium 3-nitro-1 <i>H</i> -1,2,4-triazol-5-olate                                           | 1.8 ± 0.1         | 9.06            |              |               |
|                               | 00-055-1773 | 5-Amino-3 <i>H</i> -1,2,4-triazol-3-one                                                                  | 4.4 ± 0.2         | 8.79            |              |               |
|                               | 00-051-2160 | 2,3-Di(pyridin-2-yl)pyrazine 1-oxide                                                                     | 8.1 ± 0.6         | 7.95            |              |               |
|                               | 00-051-2418 | 3,3-Diethyl-5-methylpiperidine-2,4-dione                                                                 | 18.1 ± 1.4        | 6.76            |              |               |
|                               | 00-056-1803 | Bis(2-ammonioethyl)ammonium 5-nitrosalicylate                                                            | 2.2 ± 0.1         | 9.34            | 11.46        | 93.24         |
|                               | 00-069-1336 | Methyl nicotinate                                                                                        | 7.7 ± 0.2         | 7.44            |              |               |
|                               | 00-066-0885 | A-type carbonated apatite                                                                                | 24.3 ± 0.6        | 7.15            |              |               |
|                               | 01-075-9983 | Aragonite                                                                                                | 3.9 ± 0.4         | 7.35            |              |               |
|                               | 01-086-0175 | Magnesite                                                                                                | 6.9 ± 0.3         | 8.37            |              |               |
|                               | 01-075-8878 | Pokrovskite                                                                                              | 4.5 ± 0.9         | 9.09            |              |               |

Table S5. The global WPF and Rietveld refinement parameters: (a)  $R_{WP, expected}$ , (b) goodness-of-fit (GOF), (c) polynomial coefficients for background fitting, (d) correction factors for zero offset, (d) skew, and (e) Lorentzian components

| <b>Operating Conditions</b>     | $R_{WP, expected}$ (%) | GOF  | <b>Polynomial Coefficients for Background Fitting</b>                                           | <b>Zero Offset</b> | <b>Skew = <math>s_0 + s_1 \times 2\theta + s_2 \times 2\theta^2</math></b> | <b>Lorentzian Component = <math>p_0 + p_1 \times 2\theta</math></b> |
|---------------------------------|------------------------|------|-------------------------------------------------------------------------------------------------|--------------------|----------------------------------------------------------------------------|---------------------------------------------------------------------|
| Cel/Lig 0.2<br>pH 3.5<br>320 °C | 9.24                   | 1.10 | c0 = 59.1957<br>c1 = -50.488<br>c2 = 73.9232<br>c3 = -81.0487<br>c4 = -81.3011<br>c5 = 100.446  | 0.03188            | s0 = 0.16035<br>s1 = 0.01717<br>s2 = -0.43136                              | p0 = 0.55977<br>p1 = 0.30437                                        |
| Cel/Lig 0.2<br>pH 3.5<br>360 °C | 9.75                   | 1.19 | c0 = 52.865<br>c1 = -39.791<br>c2 = 29.5528<br>c3 = -14.3716<br>c4 = -27.4027<br>c5 = 34.5093   | 0.02025            | s0 = 0.07657<br>s1 = -0.00179<br>s2 = 0.00548                              | p0 = 0.49458<br>p1 = 0.0596                                         |
| Cel/Lig 0.2<br>pH 8<br>320 °C   | 9.57                   | 1.26 | c0 = 75.5173<br>c1 = -56.1838<br>c2 = 70.8742<br>c3 = -68.4163<br>c4 = -67.9919<br>c5 = 97.3807 | 0.02597            | s0 = 0.11871<br>s1 = 0.50262<br>s2 = -0.00552                              | p0 = 0.50524<br>p1 = 0.1058                                         |
| Cel/Lig 0.2<br>pH 8<br>360 °C   | 9.68                   | 1.07 | c0 = 54.0208<br>c1 = -46.5546<br>c2 = 37.7602<br>c3 = -23.0276<br>c4 = -32.529<br>c5 = 43.4809  | 0.06898            | s0 = 0.08917<br>s1 = 0.02838<br>s2 = 0.04914                               | p0 = 0.35587<br>p1 = -0.04341                                       |
| Cel/Lig 1<br>pH 3.5<br>320 °C   | 11.76                  | 1.10 | c0 = 44.8418<br>c1 = -34.1318<br>c2 = 5.24776<br>c3 = 12.2837                                   | 0.03454            | s0 = 0.0985<br>s1 = 0.01412<br>s2 = 0.15485                                | p0 = 0.49043<br>p1 = 0.05384                                        |
| Cel/Lig 1<br>pH 3.5<br>360 °C   | 9.25                   | 1.18 | c0 = 65.5069<br>c1 = -51.194<br>c2 = 53.1437<br>c3 = -35.4933<br>c4 = -57.2507<br>c5 = 64.141   | 0.03192            | s0 = -0.19069<br>s1 = 0<br>s2 = 0                                          | p0 = 0.48135<br>p1 = 0                                              |
| Cel/Lig 1<br>pH 3.5<br>360 °C   | 9.16                   | 1.19 | c0 = 65.5782<br>c1 = -59.2886<br>c2 = 4.2048<br>c3 = 28.3708                                    | 0.06407            | s0 = 0.14121<br>s1 = 0.17242<br>s2 = 0.07242                               | p0 = 0.38215<br>p1 = 0.0558                                         |
| Cel/Lig 1<br>pH 8<br>360 °C     | 9.51                   | 1.21 | c0 = 46.9688<br>c1 = -54.5649<br>c2 = 6.15403<br>c3 = 27.653                                    | 0.02387            | s0 = 0.02649<br>s1 = -0.06423<br>s2 = -0.05071                             | p0 = 0.48513<br>p1 = 0.0271                                         |

Table S6. The phase-specific scale factor and coefficients for the full width at half maximum (FWHM) function generated from the WPF and Rietveld refinement of hydrochars' diffractograms.

| Operating Conditions            | PDF ID                        | Detected Organic/Mineral Phases                                                 | Refined Scale Factor                             | FWHM = $f_0 + f_1 \times 2\theta + f_2 \times 2\theta^2$ |
|---------------------------------|-------------------------------|---------------------------------------------------------------------------------|--------------------------------------------------|----------------------------------------------------------|
| Cel/Lig 0.2<br>pH 3.5<br>320 °C | 00-053-1717                   | Polyaniline                                                                     | 3.9                                              | $f_0 = 0.09466; f_1 = -0.01522; f_2 = 0.01906;$          |
|                                 | 00-059-1090                   | 1,2-Bis(2,6-dichlorobenzylidene)hydrazine                                       | 0.9                                              | $f_0 = 0.33335; f_1 = -0.04168; f_2 = 0.01498;$          |
|                                 | 00-055-1744                   | Ethyl-1',3',3'-trimethyl-8-nitrospiro[chromene-2,2'-indoline]-5'-carboxylate    | 1.8                                              | $f_0 = 0.06842; f_1 = -0.04312; f_2 = 0.06933;$          |
|                                 | 00-055-1827                   | Indole-2-carboxylic acid 3,5-dinitrobenzoic acid                                | 2.2                                              | $f_0 = 0.20663; f_1 = -0.01568; f_2 = 0.06051;$          |
|                                 | 00-054-2291                   | 3,5-Diamino-1H-1,2,4-triazole                                                   | 0.7                                              | $f_0 = 0.10215; f_1 = 0.03913; f_2 = -0.05916;$          |
|                                 | 00-051-2369                   | 3-Amino-4-(3-methoxyphenyl)-3,4,7,8-tetrahydro-2H-benzo[e][1,2]oxazin-6(5H)-one | 1.1                                              | $f_0 = 0.43042; f_1 = 0.33314; f_2 = 0.52489;$           |
|                                 | 00-054-1622                   | 2-(4-Hydroxyphenyl)acetonitrile                                                 | 2.3                                              | $f_0 = 0.10514; f_1 = -0.01847; f_2 = 0.10114;$          |
|                                 | 00-015-0973                   | <i>N,N</i> -dimethyl-4-nitroaniline                                             | 5.0                                              | $f_0 = 0.10713; f_1 = -0.01645; f_2 = -0.00184;$         |
|                                 | 00-009-0080                   | Monetite                                                                        | 4.4                                              | $f_0 = 0.50366; f_1 = -0.08939; f_2 = -0.1734;$          |
| 00-020-0669                     | Nesquehonite                  | 3.1                                                                             | $f_0 = 0.19023; f_1 = -0.03407; f_2 = -0.03467;$ |                                                          |
| Cel/Lig 0.2<br>pH 3.5<br>360 °C | 00-048-2341                   | 2-Aminoanthraquinone                                                            | 1.6                                              | $f_0 = 0.27121; f_1 = -0.06718; f_2 = -0.0727;$          |
|                                 | 00-062-1376                   | 1-(Anthracen-9-yl)- <i>N</i> -(phenylmethyl)methanaminium chloride              | 2.3                                              | $f_0 = 0.16414; f_1 = -0.07914; f_2 = 0.0;$              |
|                                 | 00-046-1758                   | 2,5-Dihydroxy- <i>p</i> -benzoquinone                                           | 4.9                                              | $f_0 = 0.46318; f_1 = -0.09504; f_2 = -0.14915;$         |
|                                 | 00-055-1744                   | Ethyl-1',3',3'-trimethyl-8-nitrospiro[chromene-2,2'-indoline]-5'-carboxylate    | 1.1                                              | $f_0 = 0.21639; f_1 = -0.05692; f_2 = -0.04989;$         |
|                                 | 00-037-1955                   | 1 <i>H</i> -Indoline-2,3-dione                                                  | 2.9                                              | $f_0 = 1.2553; f_1 = -0.31318; f_2 = -0.28413;$          |
|                                 | 00-043-1767                   | ( <i>E</i> )-1,2-dichloro-1,2-bis(5-phenyloxazol-2-yl)ethene                    | 0.7                                              | $f_0 = 0.05944; f_1 = -0.00895; f_2 = 0.04279;$          |
|                                 | 00-009-0080                   | Monetite                                                                        | 2.2                                              | $f_0 = 1.59637; f_1 = 0.29212; f_2 = -0.96029;$          |
|                                 | 01-086-0175                   | Magnesite                                                                       | 2.5                                              | $f_0 = 1.72297; f_1 = -0.09027; f_2 = -0.1001;$          |
| 00-055-0898                     | $\beta$ -Tricalcium phosphate | 4.5                                                                             | $f_0 = 0.23063; f_1 = -0.00772; f_2 = 0.05291;$  |                                                          |
| Cel/Lig 0.2<br>pH 8<br>320 °C   | 00-062-1368                   | 5,6-Dimethoxy-2-(2-methoxyphenyl)benzofuran-3-carbonitrile                      | 3.2                                              | $f_0 = 0.22641; f_1 = -0.05283; f_2 = -0.04124;$         |
|                                 | 00-059-1090                   | 1,2-Bis(2,6-dichlorobenzylidene)hydrazine                                       | 1.1                                              | $f_0 = 0.27397; f_1 = -0.10024; f_2 = -0.05732;$         |
|                                 | 00-038-1730                   | Tetramethylammonium hydroxide pentahydrate                                      | 0.9                                              | $f_0 = 0.10264; f_1 = -0.0355; f_2 = 0.06358;$           |

| Operating Conditions            | PDF ID      | Detected Organic/Mineral Phases                                                                                                | Refined Scale Factor | FWHM = $f_0 + f_1 \times 2\theta + f_2 \times 2\theta^2$ |
|---------------------------------|-------------|--------------------------------------------------------------------------------------------------------------------------------|----------------------|----------------------------------------------------------|
|                                 | 00-059-1064 | 4-(4-(2-(2,4-dinitrophenoxy)-ethoxy)-3-methoxy-benzylidene-amino)-1,5-dimethyl-2-phenyl-1 <i>H</i> -pyrazol-3(2 <i>H</i> )-one | 4.2                  | $f_0 = 0.14301; f_1 = -0.02857; f_2 = 0.25721;$          |
|                                 | 00-062-1046 | 2-(2,4-dichlorophenoxy)- <i>N</i> -(3,4-dichlorophenyl)acetamide                                                               | 0.8                  | $f_0 = 0.25713; f_1 = -0.02038; f_2 = 0.10009;$          |
|                                 | 00-068-1289 | ( <i>Z</i> )-3-(1-((4-hydroxyphenyl)amino)-ethylidene)chromane-2,4-dione                                                       | 4.4                  | $f_0 = 0.09496; f_1 = -0.02075; f_2 = 0.0125;$           |
|                                 | 00-046-1716 | Calcium ethylenediammonium cyclotetraphosphate dihydrate                                                                       | 1.3                  | $f_0 = 0.19132; f_1 = 0.02579; f_2 = 0.01184;$           |
|                                 | 01-072-1358 | Hydroxyl wagnerite                                                                                                             | 3.2                  | $f_0 = 0.54373; f_1 = -0.06168; f_2 = -0.19124;$         |
|                                 | 01-086-4272 | Calcite                                                                                                                        | 2.2                  | $f_0 = 1.65315; f_1 = 0.47743; f_2 = -0.96238;$          |
|                                 | 00-025-0531 | Hydromagnesite                                                                                                                 | 1.7                  | $f_0 = 0.88092; f_1 = -0.34167; f_2 = 0.0;$              |
|                                 | 00-014-0887 | 1,2-Dihydroxyanthraquinone                                                                                                     | 4.7                  | $f_0 = 0.44208; f_1 = -0.07084; f_2 = -0.09334;$         |
|                                 | 00-054-2290 | 5-Methyl-1 <i>H</i> -tetrazole                                                                                                 | 0.8                  | $f_0 = 0.2429; f_1 = 0.05248; f_2 = 0.06432;$            |
|                                 | 00-055-1762 | Ethene-1,1-diaminium 3-nitro-1 <i>H</i> -1,2,4-triazol-5-olate                                                                 | 1.2                  | $f_0 = 2.40666; f_1 = -3.56213; f_2 = 1.82797;$          |
|                                 | 00-055-1773 | 5-Amino-3 <i>H</i> -1,2,4-triazol-3-one                                                                                        | 1.2                  | $f_0 = 0.89039; f_1 = -1.89266; f_2 = 1.49957;$          |
| Cel/Lig 0.2<br>pH 8<br>360 °C   | 00-054-2339 | 3-(2,4,5-Trichlorophenoxy)propanoic acid                                                                                       | 1.7                  | $f_0 = 0.06428; f_1 = 0.11408; f_2 = -0.1008;$           |
|                                 | 00-056-1803 | Bis(2-ammonioethyl)ammonium 5-nitrosalicylate                                                                                  | 0.9                  | $f_0 = 0.65247; f_1 = -0.33681; f_2 = 0.0;$              |
|                                 | 00-058-1458 | 2-Hydroxy-3-methyl- <i>N</i> -phenethylbutanamide                                                                              | 1.6                  | $f_0 = 0.29806; f_1 = 0.00075; f_2 = 0.02059;$           |
|                                 | 00-069-0021 | Hydroxyapatite methyl phosphonic dichloride                                                                                    | 3.1                  | $f_0 = 0.16612; f_1 = 0.0; f_2 = 0.0;$                   |
|                                 | 00-066-0885 | A-type carbonated apatite                                                                                                      | 3.2                  | $f_0 = 0.16236; f_1 = 0.00132; f_2 = -0.01369;$          |
|                                 | 01-075-8878 | Pokrovskite                                                                                                                    | 0.9                  | $f_0 = 0.30566; f_1 = 0.04533; f_2 = 0.07523;$           |
|                                 | 01-081-2503 | Vaterite                                                                                                                       | 0.7                  | $f_0 = 1.20075; f_1 = 0.0; f_2 = 0.0;$                   |
|                                 | 00-067-1136 | 5-Formyl-1 <i>H</i> -pyrrole-2-carboxylic acid                                                                                 | 4.1                  | $f_0 = 0.09111; f_1 = -0.01211; f_2 = 0.02116;$          |
| Cel/Lig 1.8<br>pH 3.5<br>320 °C | 00-051-2369 | 3-Amino-4-(3-methoxyphenyl)-3,4,7,8-tetrahydro-2 <i>H</i> -benzo[ <i>e</i> ][1,2]oxazin-6(5 <i>H</i> )-one                     | 2.9                  | $f_0 = 0.16666; f_1 = 0.0; f_2 = 0.0;$                   |
|                                 | 00-048-2136 | 3-(4-Methoxy-3-nitrobenzoyl)-1,2,2-trimethyl-cyclopentane-1-carboxylic acid                                                    | 3.5                  | $f_0 = 0.22782; f_1 = 0.0; f_2 = 0.0;$                   |
|                                 | 00-043-1642 | 2-Methyl-cyclopentane-1,3-dione                                                                                                | 4.6                  | $f_0 = 1.41023; f_1 = 0.01183; f_2 = 0.06152;$           |

| Operating Conditions            | PDF ID      | Detected Organic/Mineral Phases                                                                     | Refined Scale Factor | FWHM = $f_0 + f_1 \times 2\theta + f_2 \times 2\theta^2$ |
|---------------------------------|-------------|-----------------------------------------------------------------------------------------------------|----------------------|----------------------------------------------------------|
|                                 | 00-069-1416 | 6-Methoxy-1-(2-oxo-1-phenylethyl)-1H-indole-2-carboxylic acid                                       | 4.2                  | $f_0 = 0.51023; f_1 = 0.09831; f_2 = 0.16043;$           |
|                                 | 00-056-1846 | 1-(2,4-Dichlorophenyl)-2-(2-furylcarbonyl)ethanol                                                   | 2.6                  | $f_0 = 0.52098; f_1 = 0.16247; f_2 = 0.31725;$           |
|                                 | 00-051-2327 | 5-Hydroxy-4,8-dimethyl-4a,10a-dihydro-2H,6H-pyrano[3,2-g]chromen-2-one                              | 6.2                  | $f_0 = 0.17498; f_1 = -0.00612; f_2 = 0.00912;$          |
|                                 | 01-076-4509 | Troemelite                                                                                          | 3.9                  | $f_0 = 0.0696; f_1 = -0.02283; f_2 = 0.13723;$           |
|                                 | 00-009-0080 | Monetite                                                                                            | 2.9                  | $f_0 = 0.46706; f_1 = 0.11156; f_2 = 0.00771;$           |
|                                 | 00-020-0669 | Nesquehonite                                                                                        | 3.6                  | $f_0 = 0.07882; f_1 = -0.00837; f_2 = 0.00225;$          |
|                                 | 00-068-1288 | (Z)-3-(1-((4-hydroxyphenyl)amino)-ethylidene)chromene-2,4-dione hydrate                             | 2.8                  | $f_0 = 0.15852; f_1 = -0.02152; f_2 = -0.02252;$         |
|                                 | 00-050-2384 | 1H-Pyrrole-2,5-dione                                                                                | 1.4                  | $f_0 = 0.23234; f_1 = -0.03375; f_2 = 0.0;$              |
|                                 | 00-048-2341 | 2-Aminoanthraquinone                                                                                | 4.0                  | $f_0 = 0.47114; f_1 = -0.01464; f_2 = -0.05639;$         |
|                                 | 00-046-1758 | 2,5-Dihydroxy-p-benzoquinone                                                                        | 5.3                  | $f_0 = 1.06376; f_1 = -0.11534; f_2 = 0.0;$              |
| Cel/Lig 1.8<br>pH 3.5<br>360 °C | 00-044-1802 | 3-Methyl-2,3-dihydro-1H-indazol-3-ol                                                                | 2.9                  | $f_0 = 0.25035; f_1 = -0.01125; f_2 = 0.03098;$          |
|                                 | 00-060-1457 | 6-(2,3-Dichlorophenyl)-1,2,4-triazine-3,5-diamine dimethylformamide solvate                         | 1.0                  | $f_0 = 0.69397; f_1 = -0.06813; f_2 = -0.28169;$         |
|                                 | 00-025-1569 | Calcium phosphinate acetylenedicarboxylate decahydrate                                              | 1.6                  | $f_0 = 0.30074; f_1 = 0.02469; f_2 = 0.12931;$           |
|                                 | 00-009-0080 | Monetite                                                                                            | 2.5                  | $f_0 = 1.38821; f_1 = -0.09497; f_2 = -0.05629;$         |
|                                 | 01-086-0175 | Magnesite                                                                                           | 3.1                  | $f_0 = 0.26511; f_1 = -0.01798; f_2 = 0.10129;$          |
|                                 | 00-055-0898 | $\beta$ -TCP                                                                                        | 3.7                  | $f_0 = 0.92606; f_1 = -0.08864; f_2 = 0.62359;$          |
|                                 | 00-057-1224 | 3-Methyl-5-phenoxy-1H-pyrazole-4-carboxamide                                                        | 2.1                  | $f_0 = 0.66781; f_1 = -0.05897; f_2 = 0.59681;$          |
|                                 | 00-048-2414 | 1-Methyl-4,5-diphenyl-3,4-dihydropyridin-2(1H)-one                                                  | 4.9                  | $f_0 = 1.48831; f_1 = -0.12787; f_2 = 1.12835;$          |
| Cel/Lig 1.8<br>pH 3.5<br>360 °C | 00-062-1368 | 5,6-Dimethoxy-2-(2-methoxyphenyl)benzofuran-3-carbonitrile                                          | 1.8                  | $f_0 = 0.16775; f_1 = -0.01298; f_2 = 0.19827;$          |
|                                 | 00-038-1730 | Tetramethylammonium hydroxide pentahydrate                                                          | 0.6                  | $f_0 = 0.5742; f_1 = -0.04132; f_2 = 0.72391;$           |
|                                 | 00-053-1398 | (5-chloro-2-nitrophenyl)( $\lambda^1$ -oxidaneyl)methanone·(4-methoxyphenyl)(pyridin-4-yl)methanone | 2.5                  | $f_0 = 0.45046; f_1 = 0.0; f_2 = 0.0;$                   |



| Operating Conditions          | PDF ID      | Detected Organic/Mineral Phases                                 | Refined Scale Factor | FWHM = $f_0 + f_1 \times 2\theta + f_2 \times 2\theta^2$ |
|-------------------------------|-------------|-----------------------------------------------------------------|----------------------|----------------------------------------------------------|
| Cel/Lig 1.8<br>pH 8<br>360 °C | 00-068-1289 | (Z)-3-(1-((4-hydroxyphenyl)amino)-ethylidene)chromane-2,4-dione | 1.5                  | $f_0 = 0.17944; f_1 = 0.02728; f_2 = 0.03379;$           |
|                               | 00-047-2253 | 4-(4-methoxy-2-methylphenethyl)aniline                          | 2.0                  | $f_0 = 0.05207; f_1 = -0.03914; f_2 = 0.15497;$          |
|                               | 00-055-0592 | Hydroxyapatite                                                  | 3.2                  | $f_0 = 0.08458; f_1 = -0.02891; f_2 = 0.14367;$          |
|                               | 01-070-2064 | Whitlockite                                                     | 2.2                  | $f_0 = 0.0991; f_1 = -0.0435; f_2 = 0.1092;$             |
|                               | 00-025-0531 | Hydromagnesite                                                  | 1.1                  | $f_0 = 0.12433; f_1 = -0.01123; f_2 = -0.00418;$         |
|                               | 00-014-0887 | 1,2-Dihydroxyanthraquinone                                      | 3.3                  | $f_0 = 0.22801; f_1 = 0.02146; f_2 = 0.14655;$           |
|                               | 00-054-2290 | 5-Methyl-1H-tetrazole                                           | 0.4                  | $f_0 = 0.14384; f_1 = -0.03373; f_2 = 0.0;$              |
|                               | 00-055-1762 | Ethene-1,1-diaminium 3-nitro-1H-1,2,4-triazol-5-olate           | 0.4                  | $f_0 = 1.82326; f_1 = -0.13282; f_2 = -0.26647;$         |
|                               | 00-055-1773 | 5-Amino-3H-1,2,4-triazol-3-one                                  | 0.9                  | $f_0 = 0.06321; f_1 = 0.0075; f_2 = 0.04839;$            |
|                               | 00-051-2160 | 2,3-Di(pyridin-2-yl)pyrazine 1-oxide                            | 1.7                  | $f_0 = 0.15589; f_1 = -0.01237; f_2 = 0.0;$              |
|                               | 00-051-2418 | 3,3-Diethyl-5-methylpiperidine-2,4-dione                        | 3.7                  | $f_0 = 1.98286; f_1 = -0.23916; f_2 = 2.28412;$          |
|                               | 00-056-1803 | Bis(2-ammonioethyl)ammonium 5-nitrosalicylate                   | 0.5                  | $f_0 = 0.35597; f_1 = -0.02374; f_2 = 0.0;$              |
|                               | 00-069-1336 | Methyl nicotinate                                               | 1.6                  | $f_0 = 1.99489; f_1 = -0.23981; f_2 = 1.81236;$          |
|                               | 00-066-0885 | A-type carbonated apatite                                       | 5.0                  | $f_0 = 0.15612; f_1 = -0.0357; f_2 = 0.26493;$           |
|                               | 01-075-9983 | Aragonite                                                       | 0.8                  | $f_0 = 0.20504; f_1 = -0.00431; f_2 = 0.05502;$          |
|                               | 01-086-0175 | Magnesite                                                       | 1.4                  | $f_0 = 0.08613; f_1 = -0.01203; f_2 = 0.02482;$          |
|                               | 01-075-8878 | Pokrovskite                                                     | 0.9                  | $f_0 = 0.19628; f_1 = -0.00184; f_2 = -0.00391;$         |

Table S7. Percent contribution of elements from detected minerals to the total content of corresponding elements in the hydrochar.

| HTL<br>Conditions               | Detected Minerals by XRD                                    | XRD                       |                            |                            | NMR                       |                            |                            |
|---------------------------------|-------------------------------------------------------------|---------------------------|----------------------------|----------------------------|---------------------------|----------------------------|----------------------------|
|                                 |                                                             | %P <sub>contributed</sub> | %Ca <sub>contributed</sub> | %Mg <sub>contributed</sub> | %P <sub>contributed</sub> | %Ca <sub>contributed</sub> | %Mg <sub>contributed</sub> |
| Cel/Lig 0.2<br>pH 3.5<br>320 °C | Monetite                                                    | 100%                      | 100%                       | 0%                         | 100%                      | 100%                       | 0%                         |
|                                 | Nesquehonite                                                | 0%                        | 0%                         | 100%                       | 0%                        | 0%                         | 100%                       |
| Cel/Lig 0.2<br>pH 3.5<br>360 °C | Monetite                                                    | 35.7%                     | 27.0%                      | 0%                         | 33.9%                     | 28.2%                      | 0%                         |
|                                 | Magnesite                                                   | 0%                        | 0%                         | 100%                       | 0%                        | 0%                         | 100%                       |
|                                 | β-Tricalcium phosphate                                      | 64.3%                     | 73.0%                      | 0%                         | 66.1%                     | 71.8%                      | 0%                         |
| Cel/Lig 0.2<br>pH 8<br>320 °C   | Calcium ethylenediammonium<br>cyclotetraphosphate dihydrate | 35.5%                     | 11.2%                      | 0%                         | 36.1%                     | 11.0%                      | 0%                         |
|                                 | Hydroxyl wagnerite                                          | 64.5%                     | 0%                         | 68.7%                      | 63.9%                     | 0%                         | 67.9%                      |
|                                 | Calcite                                                     | 0%                        | 88.8%                      | 0%                         | 0%                        | 89.0%                      | 0%                         |
|                                 | Hydromagnesite                                              | 0%                        | 0%                         | 31.3%                      | 0%                        | 0%                         | 32.1%                      |
| Cel/Lig 0.2<br>pH 8<br>360 °C   | Hydroxyapatite methyl phosphonic dichloride                 | 53.1%                     | 28.4%                      | 0%                         | 52.1%                     | 27.6%                      | 0%                         |
|                                 | A-type carbonated apatite                                   | 46.9%                     | 58.4%                      | 0%                         | 47.9%                     | 60.8%                      | 0%                         |
|                                 | Pokrovskite                                                 | 0%                        | 0%                         | 100%                       | 0%                        | 0%                         | 100%                       |
|                                 | Vaterite                                                    | 0%                        | 13.2%                      | 0%                         | 0%                        | 11.6%                      | 0%                         |
| Cel/Lig 1.8<br>pH 3.5<br>320 °C | Troemelite                                                  | 62.8%                     | 53.0%                      | 0%                         | 60.9%                     | 53.2%                      | 0%                         |
|                                 | Monetite                                                    | 37.2%                     | 47.0%                      | 0%                         | 39.1%                     | 46.8%                      | 0%                         |
|                                 | Nesquehonite                                                | 0%                        | 0%                         | 100%                       | 0%                        | 0%                         | 100%                       |
| Cel/Lig 1.8<br>pH 3.5<br>360 °C | Calcium phosphinate acetylenedicarboxylate<br>decahydrate   | 19.6%                     | 8.7%                       | 0%                         | 19%                       | 7.9%                       | 0%                         |
|                                 | Monetite                                                    | 35.2%                     | 31.2%                      | 0%                         | 35%                       | 31.6%                      | 0%                         |
|                                 | Magnesite                                                   | 0%                        | 0%                         | 100%                       | 0%                        | 0%                         | 100%                       |
|                                 | β-TCP                                                       | 45.2%                     | 60.1%                      | 0%                         | 46%                       | 60.5%                      | 0%                         |
| Cel/Lig 1.8<br>pH 3.5<br>360 °C | Hydroxyapatite                                              | 56.4%                     | 62.6%                      | 0%                         | 56.7%                     | 63.2%                      | 0%                         |
|                                 | Whitlockite                                                 | 43.6%                     | 37.4%                      | 14.8%                      | 43.3%                     | 36.8%                      | 15.5%                      |
|                                 | Hydromagnesite                                              | 0%                        | 0%                         | 85.2%                      | 0%                        | 0%                         | 84.5%                      |
| Cel/Lig 1.8<br>pH 8<br>360 °C   | A-type carbonated apatite                                   | 100%                      | 85.8%                      | 0%                         | 100%                      | 86.2%                      | 0%                         |
|                                 | Aragonite                                                   | 0%                        | 14.2%                      | 0%                         | 0%                        | 13.8%                      | 0%                         |
|                                 | Magnesite                                                   | 0%                        | 0%                         | 56.4%                      | 0%                        | 0%                         | 56.6%                      |
|                                 | Pokrovskite                                                 | 0%                        | 0%                         | 43.6%                      | 0%                        | 0%                         | 43.4%                      |

Table S8. Comparison between the C, P, Ca, and Mg content of hydrochar estimated using SS-NMR and directly measured using the elemental analyzers.

| HTL Process Conditions          | Techniques         | %C           | %P          | %Ca          | %Mg         |
|---------------------------------|--------------------|--------------|-------------|--------------|-------------|
| Cel/Lig 0.2<br>pH 3.5<br>320 °C | Elemental Analyzer | 45.22 ± 0.90 | 3.92 ± 0.20 | 5.06 ± 0.51  | 2.12 ± 0.11 |
|                                 | SS-NMR             | 45.04 ± 0.69 | 3.89 ± 0.93 | 5.15 ± 0.92  | 2.08 ± 0.20 |
| Cel/Lig 0.2<br>pH 3.5<br>360 °C | Elemental Analyzer | 39.51 ± 0.79 | 6.19 ± 0.31 | 10.56 ± 1.06 | 3.14 ± 0.16 |
|                                 | SS-NMR             | 39.61 ± 0.36 | 6.39 ± 1.59 | 10.62 ± 0.77 | 3.25 ± 0.15 |
| Cel/Lig 0.2<br>pH 8<br>320 °C   | Elemental Analyzer | 40.86 ± 0.82 | 4.23 ± 0.21 | 4.32 ± 0.43  | 6.16 ± 0.31 |
|                                 | SS-NMR             | 40.67 ± 0.52 | 4.25 ± 0.75 | 4.45 ± 0.79  | 6.2 ± 0.13  |
| Cel/Lig 0.2<br>pH 8<br>360 °C   | Elemental Analyzer | 32.54 ± 0.98 | 6.16 ± 0.31 | 10.63 ± 1.08 | 1.49 ± 0.17 |
|                                 | SS-NMR             | 32.33 ± 0.41 | 6.26 ± 1.01 | 10.53 ± 0.68 | 1.53 ± 0.43 |
| Cel/Lig 1<br>pH 3.5<br>320 °C   | Elemental Analyzer | 46.89 ± 1.41 | 4.6 ± 0.23  | 4.69 ± 0.49  | 1.63 ± 0.09 |
|                                 | SS-NMR             | 46.72 ± 0.64 | 4.63 ± 0.25 | 4.76 ± 0.63  | 1.67 ± 0.19 |
| Cel/Lig 1<br>pH 3.5<br>360 °C   | Elemental Analyzer | 39.49 ± 0.79 | 5.7 ± 0.29  | 8.3 ± 0.82   | 3.11 ± 0.16 |
|                                 | SS-NMR             | 39.52 ± 0.39 | 5.76 ± 0.18 | 8.32 ± 0.29  | 3.3 ± 0.26  |
| Cel/Lig 1<br>pH 3.5<br>360 °C   | Elemental Analyzer | 47.81 ± 0.96 | 4.83 ± 0.24 | 9.35 ± 0.96  | 1.57 ± 0.08 |
|                                 | SS-NMR             | 47.75 ± 0.60 | 4.9 ± 0.29  | 9.4 ± 0.32   | 1.69 ± 0.24 |
| Cel/Lig 1<br>pH 8<br>360 °C     | Elemental Analyzer | 38.11 ± 1.14 | 4.39 ± 0.22 | 11 ± 0.83    | 3.49 ± 0.87 |
|                                 | SS-NMR             | 38.31 ± 0.51 | 4.44 ± 0.39 | 11.03 ± 0.21 | 3.58 ± 0.11 |

Table S9. Comparison between the elemental content or concentration of biocrude oil and HTL-AP estimated using liquid-state NMR and directly measured using the elemental analyzers.

| HTL<br>Process<br>Conditions    | Techniques            | Biocrude     |             |             |              | HTL-AP    |           |           |
|---------------------------------|-----------------------|--------------|-------------|-------------|--------------|-----------|-----------|-----------|
|                                 |                       | %C           | %H          | %N          | %O           | [C], mg/L | [N], mg/L | [P], mg/L |
| Cel/Lig 0.2<br>pH 3.5<br>320 °C | Elemental<br>Analyzer | 55.62 ± 0.15 | 5.34 ± 0.16 | 1.25 ± 0.09 | 37.79 ± 0.05 | 9981.85   | 1155.56   | 1183.03   |
|                                 | Liquid-state<br>NMR   | 55.89 ± 0.09 | 5.37 ± 0.26 | 1.26 ± 0.04 | 37.98 ± 0.23 | 10012.33  | 1190.23   | 1193.32   |
| Cel/Lig 0.2<br>pH 3.5<br>360 °C | Elemental<br>Analyzer | 55.93 ± 0.20 | 5.38 ± 0.11 | 1.44 ± 0.19 | 37.24 ± 0.45 | 7972.88   | 3086.17   | 866.78    |
|                                 | Liquid-state<br>NMR   | 55.57 ± 0.14 | 5.35 ± 0.09 | 1.44 ± 0.26 | 37 ± 0.41    | 8018.68   | 3147.89   | 884.12    |
| Cel/Lig 0.2<br>pH 8<br>320 °C   | Elemental<br>Analyzer | 60.11 ± 0.12 | 5.62 ± 0.22 | 1.45 ± 0.30 | 32.83 ± 0.35 | 8678.44   | 1796.91   | 247.98    |
|                                 | Liquid-state<br>NMR   | 60.41 ± 0.36 | 5.64 ± 0.12 | 1.46 ± 0.17 | 32.99 ± 0.36 | 8791.47   | 1868.79   | 242.03    |
| Cel/Lig 0.2<br>pH 8<br>360 °C   | Elemental<br>Analyzer | 59.71 ± 0.19 | 5.59 ± 0.24 | 1.66 ± 0.10 | 33.05 ± 0.26 | 10273.74  | 550.66    | 166.15    |
|                                 | Liquid-state<br>NMR   | 60 ± 0.27    | 5.62 ± 0.20 | 1.66 ± 0.34 | 33.21 ± 0.22 | 10229.05  | 539.65    | 174.46    |
| Cel/Lig 1<br>pH 3.5<br>320 °C   | Elemental<br>Analyzer | 51.31 ± 0.13 | 5.12 ± 0.16 | 1.85 ± 0.41 | 41.72 ± 0.26 | 14515.33  | 3315.19   | 1446.08   |
|                                 | Liquid-state<br>NMR   | 50.98 ± 0.29 | 5.08 ± 0.14 | 1.84 ± 0.24 | 41.46 ± 0.38 | 14449.39  | 3348.34   | 1489.47   |
| Cel/Lig 1<br>pH 3.5<br>360 °C   | Elemental<br>Analyzer | 54.79 ± 0.21 | 5.48 ± 0.32 | 1.96 ± 0.14 | 37.78 ± 0.28 | 9081.02   | 2872.3    | 1418.22   |
|                                 | Liquid-state<br>NMR   | 55.06 ± 0.28 | 5.5 ± 0.11  | 1.97 ± 0.16 | 37.97 ± 0.18 | 9205.23   | 2840.7    | 1375.67   |
| Cel/Lig 1<br>pH 3.5<br>360 °C   | Elemental<br>Analyzer | 65.27 ± 0.31 | 6.34 ± 0.24 | 2.35 ± 0.27 | 26.04 ± 0.19 | 7915.84   | 2334.77   | 679.95    |
|                                 | Liquid-state<br>NMR   | 64.85 ± 0.30 | 6.3 ± 0.26  | 2.33 ± 0.22 | 25.87 ± 0.20 | 7777.59   | 2381.47   | 720.75    |
| Cel/Lig 1<br>pH 8<br>360 °C     | Elemental<br>Analyzer | 63.14 ± 0.29 | 6.15 ± 0.15 | 2.4 ± 0.39  | 28.31 ± 0.29 | 7249.48   | 951.68    | 953.53    |
|                                 | Liquid-state<br>NMR   | 63.46 ± 0.41 | 6.18 ± 0.05 | 2.41 ± 0.45 | 28.45 ± 0.06 | 7312.5    | 946.92    | 991.67    |

## BIOCRUDE OIL COMPOSITION

Table S10. Chemical composition of biocrude oil from HTL of lignin-rich digestates at pH 3.5 and 320 °C based on liquid-state <sup>13</sup>C NMR analysis.

| Detected compounds                                 | Chemical shift (ppm)                                                                 | Relative spectral area percentage |
|----------------------------------------------------|--------------------------------------------------------------------------------------|-----------------------------------|
| <b>aniline</b>                                     | 115.07, 118.39, 129.30, 146.50                                                       | 2.0%                              |
| <b>4-methyl-N,N-diphenylaniline</b>                | 20.57, 122.13, 123.25, 124.5, 128, 129.6, 132.5, 145.5, 147.5                        | 1.5%                              |
| <b>2,4-dimethylaniline</b>                         | 17.05, 20.25, 115, 122.5, 127.5, 131, 143.15                                         | 1.7%                              |
| <b>N,N-dimethylbenzylamine</b>                     | 45, 64.55, 126.5, 128, 139.5                                                         | 1.0%                              |
| <b>n-nonylamine</b>                                | 14.86, 23.5, 27.5, 29.85, 32, 34.5, 42                                               | 1.0%                              |
| <b>N-phenylacetamide</b>                           | 33.43, 131.13, 132.50, 136.58, 173.34                                                | 2.3%                              |
| <i>Subtotal amine &amp; amide</i>                  |                                                                                      | 9.5%                              |
| <b>nitrosalicylaldehyde</b>                        | 119.86, 130.04, 131.88, 140.01, 167.68, 196.34                                       | 4.7%                              |
| <b>4-hydroxy-benzenemethanol</b>                   | 63.5, 115, 128.5, 132, 156.5                                                         | 3.7%                              |
| <b>2-methoxy-4-vinylphenol</b>                     | 55.4, 107, 11, 114.6, 120.5, 130.3, 136.8, 145.7, 146.5                              | 3.0%                              |
| <b>4-ethyl-2-methoxyphenol</b>                     | 16, 19, 56, 110.15, 119.35, 120.2, 136, 144, 146                                     | 3.7%                              |
| <b>2-methoxy-4-methoxymethyl-phenol</b>            | 55.55, 57.5, 74.56, 110.67, 114.55, 120.5, 130, 145.5, 146.9                         | 3.9%                              |
| <b>4-hydroxy-3-methoxy-benzyl alcohol</b>          | 58.2, 66.8, 115, 124, 135.5, 147, 150                                                | 3.0%                              |
| <i>Subtotal phenols</i>                            |                                                                                      | 22.0%                             |
| <b>3,5-dinitrobenzoic acid</b>                     | 121.96, 129.06, 134.61, 148.76, 163.82                                               | 5.3%                              |
| <b>1,2,2-trimethyl-cyclopentane-1,3-dioic acid</b> | 20.92, 21.43, 22.32, 46.76, 52.33, 56.80, 175.24, 177.16                             | 3.2%                              |
| <i>Subtotal carboxylic acid &amp; ester</i>        |                                                                                      | 8.5%                              |
| <b>benzophenone</b>                                | 128.21, 129.96, 132.33, 137.58, 196.50                                               | 4.3%                              |
| <b>2,5-furandione</b>                              | 10.04, 142.11, 167.45                                                                | 3.8%                              |
| <b>5-methyl-2-(1-methylethyl)-cyclohexanone</b>    | 19.5, 22.3, 25, 29.4, 30.05, 30.65, 34.3, 36.2, 44, 48.5, 52, 60.65, 77.5, 78, 210.3 | 2.6%                              |
| <b>3-methyl-2-cyclopenten-1-one</b>                | 19.5, 34, 35.3, 130.5, 179, 209                                                      | 2.5%                              |
| <b>2,3-dimethyl-2-cyclopenten-1-one</b>            | 7.5, 16.8, 31, 34, 136, 169.5, 209.2                                                 | 1.7%                              |
| <i>Subtotal ketone</i>                             |                                                                                      | 14.9%                             |
| <b>trimethyl indole</b>                            | 15.11, 22.66, 56.87, 121, 123, 125, 126, 139.01, 150.57, 190.02                      | 2.4%                              |
| <b>2-acetyl-pyrrole</b>                            | 25.6, 76.78, 79.5, 110.5, 117.5, 125.5                                               | 2.2%                              |
| <b>3-methyl pyrrole</b>                            | 11.87, 109.6, 115.3, 117.5                                                           | 1.1%                              |
| <b>1-methyl-2-pyrrolidone</b>                      | 18.1, 29.6, 30.4, 49.6, 175                                                          | 1.5%                              |
| <b>1H-indole-2-carboxylic acid</b>                 | 101.14, 105.26, 129.31, 132.04, 145.66, 151.19, 164.32                               | 1.5%                              |
| <i>Subtotal N-heterocyclic</i>                     |                                                                                      | 8.7%                              |
| <b>phenylhydrazine</b>                             | 112.04, 119.82, 129.06, 151.87                                                       | 4.6%                              |
| <i>Subtotal azine &amp; nitrile</i>                |                                                                                      | 4.6%                              |
| <b>phenanthrene</b>                                | 66.9, 76.75, 122.5, 126.5, 128.5, 130, 131.7                                         | 4.5%                              |
| <b>pyrene</b>                                      | 124.6, 125.3, 127.5, 131                                                             | 2.9%                              |

| Detected compounds                                  | Chemical shift (ppm)                                  | Relative spectral area percentage |
|-----------------------------------------------------|-------------------------------------------------------|-----------------------------------|
| <b><math>\alpha</math>-phellandrene</b>             | 20, 20.75, 26, 31.5, 40, 120.5, 128, 131, 131.46      | 3.5%                              |
| <b>n-tetradecane</b>                                | 14.8, 23.5, 29.4, 32.5                                | 2.6%                              |
| <i>Subtotal alkane</i>                              |                                                       | 13.5%                             |
| <b>1,3-benzodioxole</b>                             | 100.2, 108.2, 121.7, 153.6                            | 5.3%                              |
| <b>(Z)-5-(propen-1-yl)-1,3-benzodioxole</b>         | 14, 102, 108.2, 109.6, 125.5, 133.5, 146, 148, 149.6  | 2.3%                              |
| <b>2-ethyl-furan</b>                                | 12.5, 21, 104, 110, 140.5, 158                        | 2.5%                              |
| <b>2H-chromen-2-one</b>                             | 79.7, 119.3, 127.5, 130, 134, 146.4, 156.8, 163.8     | 5.2%                              |
| <b>3,5,7-trihydroxy-2H-1-benzopyran-2-one</b>       | 102.5, 111, 112.5, 129.6, 144.65, 155.5, 160.5, 161.2 | 3.0%                              |
| <i>Subtotal furans, ether, &amp; O-heterocyclic</i> |                                                       | 18.3%                             |
| <b>Total</b>                                        |                                                       | 100%                              |

Table S11. Chemical composition of biocrude oil from HTL of lignin-rich digestates at pH 3.5 and 360 °C based on liquid-state <sup>13</sup>C NMR analysis.

| Detected compounds                                              | Chemical shift (ppm)                                                | Relative spectral area percentage |
|-----------------------------------------------------------------|---------------------------------------------------------------------|-----------------------------------|
| <b>1-pentanamine</b>                                            | 13.8, 23, 29.5, 34, 42.5                                            | 3.5%                              |
| <b>1-butanamine</b>                                             | 14, 20.3, 36, 41.7                                                  | 3.0%                              |
| <b>1-hexanamine</b>                                             | 14, 22.5, 26.5, 32, 34, 42                                          | 2.1%                              |
| <i>Subtotal amine &amp; amide</i>                               |                                                                     | 8.6%                              |
| <b>nitrosalicylaldehyde</b>                                     | 119.86, 130.04, 131.88, 140.01, 167.68, 196.34                      | 4.7%                              |
| <b>3-ethyl-5-methyl-phenol</b>                                  | 13.6, 20.3, 17.5, 113.8, 115.5, 125.5, 137.8, 143.3, 153.5          | 4.0%                              |
| <b>4-hydroxybenzyl alcohol</b>                                  | 63.75, 115, 127.9, 132, 166.5                                       | 3.3%                              |
| <b>4-ethyl-2-methoxyphenol</b>                                  | 16, 29.2, 55.5, 110.3, 114, 120.2, 136, 143.7, 146                  | 3.7%                              |
| <b>2,6-dimethoxy-phenol</b>                                     | 56, 105.6, 119, 135.4, 147.5                                        | 4.3%                              |
| <b>2-methoxy-4-methoxymethyl-phenol</b>                         | 55.55, 57.5, 74.56, 110.67, 114.55, 120.5, 130, 145.5, 146.9        | 1.6%                              |
| <i>Subtotal phenols</i>                                         |                                                                     | 21.6%                             |
| <b>quinic acid</b>                                              | 40.11, 43.42, 69.71, 73.15, 77.94, 79.74, 184.16                    | 3.4%                              |
| <b>3,4-dimethoxymandelic acid methyl ester</b>                  | 52.5, 72.5, 76, 77.5, 126.5, 128.8, 138, 173.9                      | 2.5%                              |
| <b>3-methyl-4-propyl-2,4-hexadienedioic acid dimethyl ester</b> | 17.5, 19.7, 28.2, 37.5, 41, 41.8, 51, 173, 177                      | 4.1%                              |
| <b>3-phenylcoumarin</b>                                         | 75.5, 77, 78.5, 116, 120, 124.5, 128.6, 131, 134.7, 140, 153.7, 160 | 4.2%                              |
| <i>Subtotal carboxylic acid &amp; ester</i>                     |                                                                     | 14.2%                             |
| <b>benzoquinone</b>                                             | 136.84, 188.65                                                      | 2.3%                              |
| <b>benzophenone</b>                                             | 128.21, 129.96, 132.33, 137.58, 196.50                              | 2.5%                              |
| <b>cyclopentenone</b>                                           | 29.08, 34.68, 135.04, 166.73, 213.94                                | 4.4%                              |
| <b>2-methyl-2-cyclopenten-1-one</b>                             | 10, 26, 34.3, 142, 158, 210                                         | 2.2%                              |
| <i>Subtotal ketone</i>                                          |                                                                     | 11.4%                             |
| <b>trimethyl indole</b>                                         | 15.11, 22.66, 56.87, 121, 123, 125, 126, 139.01, 150.57, 190.02     | 3.1%                              |
| <b>1-methyl-pyrrolidine</b>                                     | 24, 41.6, 56                                                        | 1.1%                              |

| Detected compounds                                  | Chemical shift (ppm)                                                       | Relative spectral area percentage |
|-----------------------------------------------------|----------------------------------------------------------------------------|-----------------------------------|
| <b>3,6-bis(2-methylpropyl)-2,5-piperazinedione</b>  | 40.3, 45, 57, 128, 129.5, 131.5, 137.5, 166.8, 169                         | 1.2%                              |
| <b>1-ethyl-2,6-dimethylpiperidine</b>               | 23.2, 25, 34, 52.4                                                         | 1.0%                              |
| <i>Subtotal N-heterocyclic</i>                      |                                                                            | 6.4%                              |
| <b>1,2-bis(diphenylmethylene)-hydrazine</b>         | 127.95, 128.55, 129.25                                                     | 1.0%                              |
| <b>phenylhydrazine</b>                              | 112.04, 119.82, 129.06, 151.87                                             | 3.2%                              |
| <i>Subtotal azine &amp; nitrile</i>                 |                                                                            | 4.2%                              |
| <b>1,3-butadiene</b>                                | 117.25, 138.3                                                              | 3.1%                              |
| <b>1-phenyl-1-butene</b>                            | 14, 21.4, 131, 134, 134.7, 138.2                                           | 1.0%                              |
| <b><math>\alpha</math>-phellandrene</b>             | 20, 20.75, 26, 31.5, 40, 120.5, 128, 131, 131.46                           | 1.6%                              |
| <b>anthracene</b>                                   | 125.57, 126.23, 129.26, 132.35                                             | 5.5%                              |
| <b>1,5,8-p-menthatriene</b>                         | 49.8, 62, 77, 113.5, 122.2, 123.21, 126.89, 129.94, 131.41, 147.53, 157.35 | 1.6%                              |
| <b>chrysene</b>                                     | 121.3, 122.78, 126.2, 127.5, 128.66, 130.5, 132                            | 2.3%                              |
| <b>perylene</b>                                     | 120.3, 126.5, 128, 129, 131, 135                                           | 1.0%                              |
| <i>Subtotal alkane</i>                              |                                                                            | 16.1%                             |
| <b>2-methyl-furan</b>                               | 13.20, 106.78, 110.52, 140.46, 152.04                                      | 5.4%                              |
| <b>3,5,7-trihydroxy-2H-1-benzopyran-2-one</b>       | 102.5, 111, 112.5, 129.6, 144.65, 155.5, 160.5, 161.2                      | 4.2%                              |
| <b>2,3-dihydrobenzofuran</b>                        | 29.65, 70.5, 109.3, 120.3, 125, 127, 127.5, 160                            | 3.9%                              |
| <b>1,3-benzodioxane-5-ol</b>                        | 100.2, 108.3, 120.2, 147.8                                                 | 4.0%                              |
| <i>Subtotal furans, ether, &amp; O-heterocyclic</i> |                                                                            | 17.5%                             |
| <b>Total</b>                                        |                                                                            | 100%                              |

Table S12. Chemical composition of biocrude oil from HTL of lignin-rich digestates at pH 8 and 320 °C based on liquid-state <sup>13</sup>C NMR analysis.

| Detected compounds                                  | Chemical shift (ppm)                                               | Relative spectral area percentage |
|-----------------------------------------------------|--------------------------------------------------------------------|-----------------------------------|
| <b>13-docosenamide</b>                              | 14, 22.25, 25.5, 27, 29.2, 31.57, 35.5, 129.6, 175.6               | 8.1%                              |
| <b>9-octadecenamide</b>                             | 14.5, 22.5, 26, 27, 29.5, 32, 36.5, 130, 176.8                     | 6.0%                              |
| <i>Subtotal amine &amp; amide</i>                   |                                                                    | 14.1%                             |
| <b>2-ethoxy-5-(1-propenyl)phenol</b>                | 14.56, 18, 65, 76, 77.5, 79, 112, 118.5, 124, 131, 132, 145, 145.5 | 4.7%                              |
| <b>4-ethyl-2-methoxyphenol</b>                      | 16, 29, 55.5, 110.3, 114, 120.3, 136, 143.5, 145.5                 | 6.4%                              |
| <b>4-chlorodiphenyl ether</b>                       | 119, 120, 124, 128.5, 129.6, 155.5, 156.1                          | 3.3%                              |
| <b>2,4-dinitro-phenetole</b>                        | 66.72, 121.04, 158.89, 140, 131.5, 131.04                          | 9.1%                              |
| <b>2,4-dihydroxy-phenetole</b>                      | 104.04, 105.5, 116.04, 137.5, 145.5, 150.5                         | 4.9%                              |
| <b>2,6-dimethoxyphenol</b>                          | 56, 105.5, 119.3, 135.5, 147.5                                     | 1.2%                              |
| <b>4-hydroxy-3-methoxy-benzyl alcohol</b>           | 58.2, 66.8, 115, 124, 135.5, 147, 150                              | 1.4%                              |
| <i>Subtotal phenols</i>                             |                                                                    | 31.0%                             |
| <b>2-formyl-6-hydroxy-3,4-dimethoxybenzoic acid</b> | 56.07, 110.5, 112.59, 121.89, 124.67, 148.84, 153.90, 172.09       | 4.5%                              |
| <b>isoamyl acetate</b>                              | 20.5, 22.5, 25.5, 38.1, 63                                         | 2.8%                              |
| <i>Subtotal carboxylic acid &amp; ester</i>         |                                                                    | 7.3%                              |
| <b>benzophenone</b>                                 | 128.21, 129.96, 132.33, 137.58, 196.50                             | 5.3%                              |

| Detected compounds                                     | Chemical shift (ppm)                                                           | Relative spectral area percentage |
|--------------------------------------------------------|--------------------------------------------------------------------------------|-----------------------------------|
| <b>3-ethyl-2-cyclopenten-1-one</b>                     | 19.5, 32.5, 35.5, 130.5, 179, 209                                              | 4.3%                              |
| <b>carvone</b>                                         | 15.5, 20.5, 3, 42.5, 109, 136, 144.5, 147, 199.8                               | 2.7%                              |
| <i>Subtotal ketone</i>                                 |                                                                                | <i>12.3%</i>                      |
| <b>2-phenyl-1H-pyrazol-3(2H)-one</b>                   | 120, 122, 127, 129, 138, 139, 150, 158, 215                                    | 4.3%                              |
| <b>2-ethyl-pyrazine</b>                                | 13.2, 29, 142, 144.4, 159                                                      | 1.6%                              |
| <b>pyrazinamide</b>                                    | 67.5, 136, 139.8, 150, 165.6                                                   | 1.5%                              |
| <b>5-methylpyrazine-2-carboxylic acid</b>              | 21, 141, 144.5, 157, 165                                                       | 2.1%                              |
| <b>3-ethyl-2,5-dimethyl-pyrazine</b>                   | 12.5, 20.7, 28.5, 140.5, 143.5, 150.5, 160.25                                  | 1.4%                              |
| <b>4-(anilinomethylene)-3-methyl-2-pyrazolin-5-one</b> | 12.5, 102, 117, 124.8, 129.65, 139, 144, 147.5, 169                            | 1.3%                              |
| <b>5-methyl-1H-indole-2,3-dione</b>                    | 20.2, 112, 117.5, 124.7, 132.5, 139, 148.6, 159.8, 184.65                      | 1.9%                              |
| <b>1-phenyl-1H-indole-2,3-dione</b>                    | 40, 110.3, 117.5, 123.5, 124, 126, 128, 129.5, 132.5, 137.5, 151.5, 157, 182.5 | 1.2%                              |
| <b>carbazole</b>                                       | 110.5, 118, 119.5, 122.5, 125.5, 140                                           | 1.0%                              |
| <i>Subtotal N-heterocyclic</i>                         |                                                                                | <i>16.3%</i>                      |
| <b>phenylhydrazine</b>                                 | 112.04, 119.82, 129.06, 151.87                                                 | 2.8%                              |
| <i>Subtotal azine &amp; nitrile</i>                    |                                                                                | <i>2.8%</i>                       |
| <b>benzodioxane</b>                                    | 64.33, 117.06, 120.93, 144.13                                                  | 4.2%                              |
| <b>3-acetyl-4-hydroxy-2H-chromen-2-one</b>             | 116.51, 118.89, 124.43, 127.95, 131.79, 143.48, 153.99, 160.63                 | 2.3%                              |
| <b>dihydro-2,5-furandione</b>                          | 111.5, 113.5, 119.6, 121.5, 122.5, 124, 127, 128, 129.5, 137.5, 138.4          | 2.5%                              |
| <b>2-phenoxyethyl-oxirane</b>                          | 44, 50, 68.5, 114.5, 121, 129.5, 158.7                                         | 1.0%                              |
| <b>7-carboxycoumarin</b>                               | 118, 122.5, 126, 129, 134.8, 144.5, 153.75, 161, 167.5                         | 1.5%                              |
| <b>7-diethylamino-4-methylcoumarin</b>                 | 12.3, 18.4, 44.6, 97.5, 108.5, 125.5, 151, 152.5, 156, 162                     | 1.3%                              |
| <b>4-hydroxy-2H-chromen-2-one</b>                      | 91.5, 116, 124, 132.3, 154, 163, 166                                           | 3.4%                              |
| <i>Subtotal furans, ether, &amp; O-heterocyclic</i>    |                                                                                | <i>16.2%</i>                      |
| <b>Total</b>                                           |                                                                                | <b>100%</b>                       |

Table S13. Chemical composition of biocrude oil from HTL of lignin-rich digestates at pH 8 and 360 °C based on liquid-state <sup>13</sup>C NMR analysis.

| Detected compounds                | Chemical shift (ppm)                                  | Relative spectral area percentage |
|-----------------------------------|-------------------------------------------------------|-----------------------------------|
| <b>N,N-dimethylbenzamide</b>      | 35.5, 39, 127, 128.2, 129.5, 136.5, 171               | 3.4%                              |
| <b>1-pentanamine</b>              | 13.8, 23, 29.5, 34, 42.5                              | 3.6%                              |
| <b>nonylamine</b>                 | 14.5, 23.1, 27.5, 30, 32.5, 34.6, 42                  | 2.5%                              |
| <b>phthalimide</b>                | 39, 39.5, 40.5, 123, 132.5, 134, 169.6                | 2.5%                              |
| <i>Subtotal amine &amp; amide</i> |                                                       | <i>12.0%</i>                      |
| <b>2,6-dimethoxy-phenol</b>       | 56, 105.2, 119, 135.6, 147.5                          | 8.5%                              |
| <b>guaiacol</b>                   | 55.84, 110.89, 114.69, 120.04, 121.49, 146.02, 146.71 | 6.4%                              |
| <b>4-ethyl-2-methoxyphenol</b>    | 16, 29, 55.5, 110.3, 114, 120.3, 136, 143.5, 145.5    | 11.1%                             |
| <i>Subtotal phenols</i>           |                                                       | <i>26.0%</i>                      |



| Detected compounds                                  | Chemical shift (ppm)                                    | Relative spectral area percentage |
|-----------------------------------------------------|---------------------------------------------------------|-----------------------------------|
| quinic acid                                         | 40.11, 43.42, 69.71, 73.15, 77.94,<br>79.74, 184.16     | 5.4%                              |
| <i>Subtotal carboxylic acid &amp; ester</i>         |                                                         | 5.4%                              |
| anthraquinone                                       | 127.53, 134.11, 183.27                                  | 2.4%                              |
| benzophenone                                        | 128.21, 129.96, 132.33, 137.58,<br>196.50               | 2.6%                              |
| 3-ethyl-2-cyclopenten-1-one                         | 19.5, 32.5, 35.5, 130.5, 179, 209                       | 1.5%                              |
| pyrone                                              | 106.19, 117.03, 143.11, 152.26,<br>161.78               | 2.8%                              |
| cyclohexanone                                       | 25.42, 27.32, 41.57, 214.02                             | 1.0%                              |
| 2-methylcyclohexanone                               | 14.5, 25.5, 28, 37, 41.5, 46                            | 1.1%                              |
| <i>Subtotal ketone</i>                              |                                                         | 11.4%                             |
| caprolactam                                         | 25, 30.5, 31.8, 37.7, 45                                | 1.6%                              |
| 7-methyl-2,3-dihydro-1H-indole                      | 22.5, 38, 55, 109, 118, 124.5, 127.5,<br>128.78, 151    | 1.9%                              |
| 1-methylimidazolidine-2,4,5-trione                  | 24, 154.5, 158, 159.3                                   | 1.8%                              |
| hydantoin                                           | 38.5, 39, 40, 40.5, 47.5, 77.5, 79,<br>80, 158.5, 174   | 2.0%                              |
| 4-piperidinone                                      | 42, 46, 214.5                                           | 2.2%                              |
| 2,8-dimethyl-indolizine                             | 99.6, 110.3, 112.63, 114, 117.5,<br>119.5, 125.5, 133.5 | 1.5%                              |
| 1-(p-methoxyphenyl)piperazine,<br>succinate         | 34.6, 44.5, 48.9, 57, 67.5, 116, 121,<br>145, 155, 183  | 1.5%                              |
| <i>Subtotal N-heterocyclic</i>                      |                                                         | 12.5%                             |
| methylcyclohexane                                   | 25, 32, 33.5, 36                                        | 3.3%                              |
| 2,2,4-trimethyl-pentane                             | 25, 25.5, 30.3, 30.9, 53.25                             | 2.8%                              |
| 2-methyl-naphthalene                                | 21.65, 77, 125, 125.5, 126, 127.5,<br>131, 134, 135.5   | 2.9%                              |
| anthracene                                          | 125.57, 126.23, 129.26, 132.35                          | 5.8%                              |
| $\alpha$ -phellandrene                              | 20, 20.75, 26, 31.5, 40, 120.5, 128,<br>131, 131.46     | 2.1%                              |
| n-hexadecane                                        | 14, 23, 29.6, 30, 32.4                                  | 2.4%                              |
| <i>Subtotal alkane</i>                              |                                                         | 19.3%                             |
| 2-methyl-2-phenyloxirane                            | 22.44, 63.56, 114.35, 120.05,<br>129.86, 159.64         | 3.3%                              |
| isocoumarin                                         | 107, 121.75, 125.5, 128, 129.5,<br>134.5, 136, 145, 162 | 3.7%                              |
| ethoxybenzene                                       | 15.04, 63.56, 114.35, 120.05,<br>129.86, 159.64         | 4.0%                              |
| <i>Subtotal furans, ether, &amp; O-heterocyclic</i> |                                                         | 11.0%                             |
| 2-phenylacetaldehyde                                | 49.35, 131.13, 132.50, 136.58,<br>199.6                 | 2.4%                              |
| <i>Subtotal aldehyde</i>                            |                                                         | 2.4%                              |
| <b>Total</b>                                        |                                                         | <b>100%</b>                       |

Table S14. Chemical composition of biocrude oil from HTL of cellulose-rich digestates at pH 3.5 and 320 °C based on liquid-state <sup>13</sup>C NMR analysis.

| Detected compounds                          | Chemical shift (ppm)                                               | Relative spectral area percentage |
|---------------------------------------------|--------------------------------------------------------------------|-----------------------------------|
| 2-methoxyaniline                            | 55.04, 110.04, 115.04, 119, 121, 137, 148                          | 5.2%                              |
| n-nonylamine                                | 14.86, 23.5, 27.5, 29.85, 32, 34.5, 42                             | 3.2%                              |
| <i>Subtotal amine &amp; amide</i>           |                                                                    | 8.4%                              |
| 4-ethyl-2-methoxyphenol                     | 16, 29.2, 55.5, 110.3, 114, 120.2, 136, 143.7, 146                 | 4.1%                              |
| 4-hydroxy-benzenemethanol                   | 63.5, 115, 128.5, 132, 156.5                                       | 4.8%                              |
| 2-methoxy-4-methoxymethyl-phenol            | 55.55, 57.5, 74.56, 110.67, 114.55, 120.5, 130, 145.5, 146.9       | 5.6%                              |
| 2-ethoxy-5-(1-propenyl)phenol               | 14.56, 18, 65, 76, 77.5, 79, 112, 118.5, 124, 131, 132, 145, 145.5 | 2.4%                              |
| 4-hydroxy-3-methoxy-benzyl alcohol          | 58.2, 66.8, 115, 124, 135.5, 147, 150                              | 3.3%                              |
| <i>Subtotal phenols</i>                     |                                                                    | 20.2%                             |
| 1,2,2-trimethyl-cyclopentane-1,3-dioic acid | 21.15, 22.5, 32.04, 39.85, 45.95, 52.04, 55.1, 175, 177            | 3.0%                              |
| 2-methylbutyrate                            | 11.2, 16.34, 27.5, 41.25, 51.5                                     | 5.0%                              |
| <i>Subtotal carboxylic acid &amp; ester</i> |                                                                    | 8.0%                              |
| 2-methylcyclopentane-1,3-dione              | 5.5, 30.04, 198.04                                                 | 7.2%                              |
| 3-ethyl-2-cyclopenten-1-one butyrolactone   | 19.5, 32.5, 35.5, 130.5, 179, 209, 22.35, 28.57, 69                | 3.4%                              |
| 3-methyl-2-cyclopenten-1-one                | 19.5, 34, 35.3, 130.5, 179, 209                                    | 1.8%                              |
| <i>Subtotal ketone</i>                      |                                                                    | 4.4%                              |
| 1-methyl-2-pyrrolidone                      | 18.1, 29.6, 30.4, 49.6, 175                                        | 16.8%                             |
| 5-formyl-1H-pyrrole-2-carboxylic acid       | 109.85, 115, 122, 162                                              | 1.2%                              |
| 6-methoxy-1H-indole-2-carboxylic acid       | 10, 55.51, 94.35, 109, 111, 119, 120.5, 122.5, 137, 156            | 2.0%                              |
| 2,8-dimethyl-indolizine                     | 99.6, 110.3, 112.63, 114, 117.5, 119.5, 125.5, 133.5               | 1.0%                              |
| 2-acetyl-pyrrole                            | 25.6, 76.78, 79.5, 110.5, 117.5, 125.5                             | 1.4%                              |
| 3-methyl pyrrole                            | 11.87, 109.6, 115.3, 117.5                                         | 1.3%                              |
| pyrazinamide                                | 67.5, 136, 139.8, 150, 165.6                                       | 1.0%                              |
| <i>Subtotal N-heterocyclic</i>              |                                                                    | 1.1%                              |
| (2-methoxyphenyl)hydrazine                  | 56.5, 112.5, 119, 122, 127, 132.5, 151                             | 9.0%                              |
| <i>Subtotal azine &amp; nitrile</i>         |                                                                    | 3.3%                              |
| 1,1-dimethyl-cyclohexane                    | 22.19, 26.65, 29.12, 30.04, 39.85                                  | 3.5%                              |
| n-tetradecane                               | 14.8, 23.5, 29.4, 32.5                                             | 2.5%                              |
| n-octadecane                                | 14, 23.15, 29.95, 32.05                                            | 1.5%                              |
| phenanthrene                                | 66.9, 76.75, 122.5, 126.5, 128.5, 130, 131.7                       | 2.7%                              |
| <i>Subtotal alkane</i>                      |                                                                    | 10.2%                             |
| 3,5,7-trihydroxy-2H-1-benzopyran-2-one      | 102.5, 111, 112.5, 129.6, 144.65, 155.5, 160.5, 161.2              | 2.0%                              |
| 1,3-benzodioxane-5-ol                       | 100.2, 108.3, 120.2, 147.8                                         | 3.9%                              |
| 2,5-dimethylfuran                           | 13.25, 106.5, 150.05                                               | 1.5%                              |
| (Z)-5-(propen-1-yl)-1,3-benzodioxole        | 14, 102, 108.2, 109.6, 125.5, 133.5, 146, 148, 149.6               | 1.6%                              |
| pentyl furan                                | 14, 22.5, 28, 31, 104.35, 110, 140.5, 166.08                       | 2.6%                              |
| 2-ethyl-furan                               | 12.5, 21, 104, 110, 140.5, 158                                     | 1.3%                              |

| Detected compounds                                  | Chemical shift (ppm)                                              | Relative spectral area percentage |
|-----------------------------------------------------|-------------------------------------------------------------------|-----------------------------------|
| 5-hydroxy-3,6-dimethyl-2H-chromen-2-one             | 18, 102, 102.5, 103, 110, 126, 152.5, 155, 160.5, 161             | 1.7%                              |
| <i>Subtotal furans, ether, &amp; O-heterocyclic</i> |                                                                   | 14.6%                             |
| 2,5-dihydroxy-3,6-dimethyl-benzaldehyde             | 19, 20.5, 132, 132.5, 134, 136, 137.5, 192.5                      | 2.8%                              |
| 2-methoxy-4,5-dimethyl-benzaldehyde                 | 15.54, 19.46, 55.51, 112.55, 124.13, 127.5, 134, 141, 162, 191.15 | 6.7%                              |
| <i>Subtotal aldehyde</i>                            |                                                                   | 9.5%                              |
| <b>Total</b>                                        |                                                                   | 100%                              |

Table S15. Chemical composition of biocrude oil from HTL of cellulose-rich digestates at pH 3.5 and 360 °C based on liquid-state <sup>13</sup>C NMR analysis.

| Detected compounds                                       | Chemical shift (ppm)                                         | Relative spectral area percentage |
|----------------------------------------------------------|--------------------------------------------------------------|-----------------------------------|
| 1-butanamine                                             | 14, 20.3, 36, 41.7                                           | 3.3%                              |
| 1-pentanamine                                            | 13.8, 23, 29.5, 34, 42.5                                     | 3.0%                              |
| <i>Subtotal amine &amp; amide</i>                        |                                                              | 6.3%                              |
| 2-methoxy-4-methoxymethyl-phenol                         | 55.55, 57.5, 74.56, 110.67, 114.55, 120.5, 130, 145.5, 146.9 | 8.5%                              |
| 2,6-dimethoxy-phenol                                     | 56, 105.6, 119, 135.4, 147.5                                 | 3.2%                              |
| 1,3,5-benzenetriol                                       | 103.21, 105.57, 116.58, 137.86, 146.04, 150.69               | 3.0%                              |
| 4-ethyl-2-methoxyphenol                                  | 16, 29.2, 55.5, 110.3, 114, 120.2, 136, 143.7, 146           | 3.8%                              |
| <i>Subtotal phenols</i>                                  |                                                              | 18.5%                             |
| quinic acid                                              | 40.11, 43.42, 69.71, 73.15, 77.94, 79.74, 184.16             | 4.5%                              |
| 3-methyl-4-propyl-2,4-hexadienedioic acid dimethyl ester | 17.5, 19.7, 28.2, 37.5, 41, 41.8, 51, 173, 177               | 4.2%                              |
| <i>Subtotal carboxylic acid &amp; ester</i>              |                                                              | 8.7%                              |
| anthraquinone                                            | 127.53, 134.11, 183.27                                       | 4.2%                              |
| benzoquinone                                             | 136.84, 188.65                                               | 3.5%                              |
| benzophenone                                             | 128.21, 129.96, 132.33, 137.58, 196.5                        | 3.1%                              |
| cyclopentenone                                           | 28.15, 34.56, 135, 166, 216                                  | 3.5%                              |
| 2,3-dimethyl-2-cyclopenten-1-one                         | 7.5, 17.04, 136, 169.73, 209.48                              | 1.0%                              |
| 2-methyl-2-cyclopenten-1-one                             | 10, 26, 34.3, 142, 158, 210                                  | 1.0%                              |
| 3-methyl-2-cyclopenten-1-one                             | 19.5, 34, 35.3, 130.5, 179, 209                              | 1.0%                              |
| tetrahydro-2H-pyran-2-one                                | 21, 27.80, 33.64, 63, 172.35                                 | 1.0%                              |
| <i>Subtotal ketone</i>                                   |                                                              | 18.3%                             |
| 3,6-bis(2-methylpropyl)-2,5-piperazinedione              | 40.3, 45, 57, 128, 129.5, 131.5, 137.5, 166.8, 169           | 2.5%                              |
| 3-amino-2,6-dimethoxy-pyridine                           | 53.5, 100.9, 107.35, 136, 156, 162.35                        | 2.0%                              |
| 1-methyl-pyrrolidine                                     | 24, 42.35, 56.55                                             | 1.5%                              |
| 1-ethyl-2,6-dimethylpiperidine                           | 23.2, 25, 34, 52.4                                           | 2.0%                              |
| <i>Subtotal N-heterocyclic</i>                           |                                                              | 8.0%                              |
| phenylhydrazine                                          | 112.04, 119.82, 129.06, 151.87                               | 3.3%                              |
| <i>Subtotal azine &amp; nitrile</i>                      |                                                              | 3.3%                              |
| anthracene                                               | 125.57, 126.23, 129.26, 132.35                               | 3.8%                              |
| 1,3-butadiene                                            | 117.25, 138.3                                                | 4.2%                              |
| 1-phenyl-1-butene                                        | 14, 22, 126.5, 128, 134.5, 138                               | 5.0%                              |

| Detected compounds                                  | Chemical shift (ppm)                            | Relative spectral area percentage |
|-----------------------------------------------------|-------------------------------------------------|-----------------------------------|
| phenanthrene                                        | 66.9, 76.75, 122.5, 126.5, 128.5, 130, 131.7    | 3.0%                              |
| <i>Subtotal alkane</i>                              |                                                 | <i>16.0%</i>                      |
| furan-2,5-dione                                     | 10.04, 142.11, 167.45                           | 4.5%                              |
| 2-methyl-furan                                      | 13.20, 106.78, 110.52, 140.46, 152.04           | 2.3%                              |
| 2,5-dimethyltetrahydrofuran                         | 23.05, 35, 76.5                                 | 1.8%                              |
| 2(5H)-furanone                                      | 72.5, 120.19, 155, 174                          | 2.3%                              |
| 3-acetyl-4-hydroxy-2H-chromen-2-one                 | 30, 101, 121, 125, 126, 127, 128, 151, 154, 178 | 2.5%                              |
| 4-hydroxy-2H-chromen-2-one                          | 90.5, 118, 121.5, 133, 152, 161, 166.5          | 2.0%                              |
| 1,3-benzodioxane-5-ol                               | 100.2, 108.3, 120.2, 147.8                      | 1.6%                              |
| <i>Subtotal furans, ether, &amp; O-heterocyclic</i> |                                                 | <i>17.0%</i>                      |
| octanal                                             | 14.1, 22.5, 29.6, 31.85, 44                     | 3.9%                              |
| <i>Subtotal aldehyde</i>                            |                                                 | <i>3.9%</i>                       |
| <b>Total</b>                                        |                                                 | <b>100%</b>                       |

Table S16. Chemical composition of biocrude oil from HTL of cellulose-rich digestates at pH 8 and 320 °C based on liquid-state <sup>13</sup>C NMR analysis.

| Detected compounds                           | Chemical shift (ppm)                                               | Relative spectral area percentage |
|----------------------------------------------|--------------------------------------------------------------------|-----------------------------------|
| 13-docosenamide                              | 14, 22.25, 25.5, 27, 29.2, 31.57, 35.5, 129.6, 175.6               | 3.1%                              |
| <i>Subtotal amine &amp; amide</i>            |                                                                    | <i>3.1%</i>                       |
| 2-ethoxy-5-(1-propenyl)phenol                | 14.56, 18, 65, 76, 77.5, 79, 112, 118.5, 124, 131, 132, 145, 145.5 | 5.4%                              |
| 4-ethyl-2-methoxyphenol                      | 16, 29, 55.5, 110.3, 114, 120.3, 136, 143.5, 145.5                 | 4.6%                              |
| 2,4-dihydroxy-phenetole                      | 104.04, 105.5, 116.04, 137.5, 145.5, 150.5                         | 3.1%                              |
| 2,6-dimethoxyphenol                          | 56, 105.5, 119.3, 135.5, 147.5                                     | 2.3%                              |
| <i>Subtotal phenols</i>                      |                                                                    | <i>15.4%</i>                      |
| isoamyl acetate                              | 20.5, 22.5, 25.5, 38.1, 63                                         | 2.2%                              |
| 2-formyl-6-hydroxy-3,4-dimethoxybenzoic acid | 56.07, 110.5, 112.59, 121.89, 124.67, 148.84, 153.9, 172.09        | 4.5%                              |
| 3,5-dinitrobenzoic acid                      | 121.96, 129.06, 134.61, 148.76, 163.82                             | 3.6%                              |
| <i>Subtotal carboxylic acid &amp; ester</i>  |                                                                    | <i>10.3%</i>                      |
| 3-methyl-2-cyclopenten-1-one                 | 19.5, 34, 35.3, 130.5, 179, 209                                    | 1.5%                              |
| 3-ethyl-2-cyclopenten-1-one                  | 19.5, 32.5, 35.5, 130.5, 179, 209                                  | 1.0%                              |
| carvone                                      | 15.5, 20.5, 3, 42.5, 109, 136, 144.5, 147, 199.8                   | 1.7%                              |
| benzophenone                                 | 128.21, 129.96, 132.33, 137.58, 196.5                              | 3.0%                              |
| pyrone                                       | 106.19, 117.03, 143.11, 152.26, 161.78                             | 4.2%                              |
| <i>Subtotal ketone</i>                       |                                                                    | <i>11.4%</i>                      |
| 2-ethyl-pyrazine                             | 13.2, 29, 142, 144.4, 159                                          | 1.5%                              |
| pyrazinamide                                 | 67.5, 136, 139.8, 150, 165.6                                       | 1.7%                              |
| quinoxaline                                  |                                                                    | 1.3%                              |
| 3-ethyl-2,5-dimethyl-pyrazine                | 12.5, 20.7, 28.5, 140.5, 143.5, 150.5, 160.25                      | 2.0%                              |
| 1,3-dimethyl-1H-pyrazole-4-carbaldehyde      | 39.55, 106, 131, 151.5, 186                                        | 10.3%                             |
| benzoyl pyridine                             | 125, 126, 128, 131, 133, 137.5, 148, 155, 194                      | 7.1%                              |

| Detected compounds                                  | Chemical shift (ppm)                                                       | Relative spectral area percentage |
|-----------------------------------------------------|----------------------------------------------------------------------------|-----------------------------------|
| pyridinone                                          | 122, 123, 124, 136, 137, 138, 149, 150, 151                                | 4.6%                              |
| 2,3-dimethyl indole                                 | 8, 10.65, 106.75, 110, 118, 119, 120.5, 129.5, 130.5, 135.5                | 1.1%                              |
| 2-methyl-imidazole                                  | 13.5, 120.65, 144.5                                                        | 1.1%                              |
| <i>Subtotal N-heterocyclic</i>                      |                                                                            | 30.7%                             |
| phenylhydrazine                                     | 112.04, 119.82, 129.06, 151.87                                             | 4.1%                              |
| <i>Subtotal azine &amp; nitrile</i>                 |                                                                            | 4.1%                              |
| 1,5,8-p-menthatriene                                | 49.8, 62, 77, 113.5, 122.2, 123.21, 126.89, 129.94, 131.41, 147.53, 157.35 | 3.1%                              |
| octylamine                                          | 14, 23, 27.5, 29.5, 32, 34.5, 42                                           | 4.5%                              |
| m-terphenyl                                         | 126.67, 128.2, 129.8, 141, 141.6                                           | 3.4%                              |
| <i>Subtotal alkane</i>                              |                                                                            | 11.0%                             |
| 4-hydroxy-2H-chromen-2-one                          | 90.5, 116, 124.3, 132.5, 152, 162, 166                                     | 2.3%                              |
| 2(5H)-furanone                                      | 72.5, 120.5, 155, 174.56                                                   | 2.1%                              |
| 5-methyl-2-furancarboxaldehyde                      | 14.3, 109.86, 124.72, 152, 159.89, 176.86                                  | 1.5%                              |
| 2-methyl-2-phenyloxirane                            | 22.44, 26.57, 57.09, 72.11, 125.04, 128.69, 140.96                         | 2.2%                              |
| 4-methoxy-phenylethene                              | 40.53, 65.33, 129.19, 131.79, 141.83                                       | 2.5%                              |
| 4-chlorodiphenyl ether                              | 119, 120, 123.66, 128.56, 129.57, 155.5, 156.25                            | 0.4%                              |
| <i>Subtotal furans, ether, &amp; O-heterocyclic</i> |                                                                            | 11.0%                             |
| octanal                                             | 14.1, 22.5, 29.6, 31.85, 44                                                | 3.0%                              |
| <i>Subtotal aldehyde</i>                            |                                                                            | 3.0%                              |
| <b>Total</b>                                        |                                                                            | 100%                              |

Table S17. Chemical composition of biocrude oil from HTL of cellulose-rich digestates at pH 8 and 360 °C based on liquid-state <sup>13</sup>C NMR analysis.

| Detected compounds                          | Chemical shift (ppm)                                         | Relative spectral area percentage |
|---------------------------------------------|--------------------------------------------------------------|-----------------------------------|
| nonylamine                                  | 14.5, 23.1, 27.5, 30, 32.5, 34.6, 42                         | 3.2%                              |
| 1-pentanamine                               | 13.8, 23, 29.5, 34, 42.5                                     | 4.0%                              |
| 9-octadecenamide                            | 14.5, 22.5, 26, 27, 29.5, 32, 36.5, 130, 176.8               | 3.8%                              |
| <i>Subtotal amine &amp; amide</i>           |                                                              | 11.0%                             |
| 4-ethyl-2-methoxyphenol                     | 16, 29, 55.5, 110.3, 114, 120.3, 136, 143.5, 145.5           | 5.7%                              |
| guaiacol                                    | 55.84, 110.89, 114.69, 120.04, 121.49, 146.02, 146.71        | 3.4%                              |
| 2-methoxy-4-methoxymethyl-phenol            | 55.55, 57.5, 74.56, 110.67, 114.55, 120.5, 130, 145.5, 146.9 | 4.5%                              |
| 2,6-dimethoxy-phenol                        | 56, 105.6, 119, 135.4, 147.5                                 | 3.0%                              |
| 1,3,5-benzenetriol                          | 103.21, 105.57, 116.58, 137.86, 146.04, 150.69               | 1.9%                              |
| <i>Subtotal phenols</i>                     |                                                              | 18.5%                             |
| 1,5-dimethyl-2-methylpentanedioate          | 17.1, 20.4, 32.5, 36.2, 51, 62, 169, 175                     | 4.0%                              |
| quinic acid                                 | 40.11, 43.42, 69.71, 73.15, 77.94, 79.74, 184.16             | 5.5%                              |
| <i>Subtotal carboxylic acid &amp; ester</i> |                                                              | 9.5%                              |
| anthraquinone                               | 127.53, 134.11, 183.27                                       | 3.2%                              |

| Detected compounds                                  | Chemical shift (ppm)                                 | Relative spectral area percentage |
|-----------------------------------------------------|------------------------------------------------------|-----------------------------------|
| benzophenone                                        | 128.21, 129.96, 132.33, 137.58, 196.5                | 3.6%                              |
| pyrone                                              | 106.19, 117.03, 143.11, 152.26, 161.78               | 3.0%                              |
| 3-methyl-2-cyclopenten-1-one                        | 19.5, 34, 35.3, 130.5, 179, 209                      | 2.0%                              |
| 3-ethyl-2-cyclopenten-1-one                         | 19.5, 32.5, 35.5, 130.5, 179, 209                    | 1.4%                              |
| <i>Subtotal ketone</i>                              |                                                      | <i>13.2%</i>                      |
| 2,3-diethylpyrazine                                 | 12.5, 27.5, 77.5, 141, 156.5                         | 3.7%                              |
| 3,5-dimethyl-pyrazole                               | 11.45, 104.33, 145                                   | 3.1%                              |
| pyrazolidine                                        | 28.43, 48.66                                         | 3.5%                              |
| 1,4-dimethylpiperazine                              | 46.35, 55, 77.46                                     | 3.0%                              |
| 7-methyl-2,3-dihydro-1H-indole                      | 22.5, 38, 55, 109, 118, 124.5, 127.5, 128.78, 151    | 3.1%                              |
| 1-methylimidazolidine-2,4,5-trione                  | 24, 154.5, 158, 159.3                                | 2.3%                              |
| 1,3-diallyl-imidazolidine                           | 52, 58.23, 75.56, 116.77, 135.5                      | 1.9%                              |
| 3,6-bis(2-methylpropyl)-2,5-piperazinedione         | 40.3, 45, 57, 128, 129.5, 131.5, 137.5, 166.8, 169   | 1.1%                              |
| 4-piperidinone                                      | 42, 46, 214.5                                        | 1.0%                              |
| 2,8-dimethyl-indolizine                             | 99.6, 110.3, 112.63, 114, 117.5, 119.5, 125.5, 133.5 | 1.0%                              |
| 1-methyl-pyrrolidine                                | 24, 42.35, 56.55                                     | 1.0%                              |
| <i>Subtotal N-heterocyclic</i>                      |                                                      | <i>24.7%</i>                      |
| n-hexadecane                                        | 14, 23, 29.6, 30, 32.4                               | 5.0%                              |
| anthracene                                          | 125.57, 126.23, 129.26, 132.35                       | 6.0%                              |
| <i>Subtotal alkane</i>                              |                                                      | <i>11.0%</i>                      |
| 2-pentyl-furan                                      | 14, 22.5, 28, 31, 104.35, 110, 140.5, 166.08         | 6.9%                              |
| <i>Subtotal furans, ether, &amp; O-heterocyclic</i> |                                                      | <i>6.9%</i>                       |
| octanal                                             | 14.1, 22.5, 29.6, 31.85, 44                          | 5.2%                              |
| <i>Subtotal aldehyde</i>                            |                                                      | <i>5.2%</i>                       |
| <b>Total</b>                                        |                                                      | <b>100%</b>                       |

## HTL-AP COMPOSITION

Table S18. Chemical composition of HTL-AP from HTL of lignin-rich digestates at pH 3.5 and 320 °C based on liquid-state <sup>13</sup>C NMR analysis.

| Detected compounds                                  | Chemical shift (ppm)                                           | Relative spectral area percentage |
|-----------------------------------------------------|----------------------------------------------------------------|-----------------------------------|
| 4-nitroaniline                                      | 112.56, 127.36, 136.43, 156.11                                 | 3.1%                              |
| acetamide                                           | 22.11, 170.66                                                  | 6.4%                              |
| <i>Subtotal amine &amp; amide</i>                   |                                                                | 9.5%                              |
| 3-isopropylpyrocatechol                             | 22.5, 27, 113.5, 117.5, 119.8, 135.5, 142.5, 144.6             | 5.8%                              |
| 4-(hydroxymethyl)phenol                             | 60.04, 111.82, 131.13, 132.42, 133.60, 167.90                  | 4.3%                              |
| phenol                                              | 115.48, 121.09, 129.79, 155.02                                 | 5.8%                              |
| o-cresol                                            | 17.5, 118, 123.5, 127.5, 129.7, 134, 153.4                     | 4.9%                              |
| <i>Subtotal phenols</i>                             |                                                                | 20.8%                             |
| pyruvic acid                                        | 29.22, 172.98                                                  | 3.2%                              |
| benzoic acid                                        | 128.49, 129.40, 130.28, 133.83, 172.70                         | 3.1%                              |
| acetic acid                                         | 25.98, 184.11                                                  | 7.4%                              |
| 3,5-dihydroxybenzoic acid                           | 107, 108.41, 132.5, 158.7, 164                                 | 3.6%                              |
| 2-oxovaleric acid                                   | 13.4, 17, 35.5, 40, 162, 186.5                                 | 3.2%                              |
| trans-cinnamic acid                                 | 126.5, 130, 132, 137.8, 143.8, 178.6                           | 2.8%                              |
| 4-acetyl benzoic acid                               | 27, 39.02, 40.02, 40.54, 77, 78.5, 128.2, 130, 135, 140, 167.5 | 3.2%                              |
| <i>Subtotal carboxylic acid &amp; ester</i>         |                                                                | 26.5%                             |
| butanone                                            | 8.89, 30.03, 38.44, 211.47                                     | 8.0%                              |
| methyl vinyl ketone                                 | 26, 129, 138, 199.5                                            | 8.3%                              |
| <i>Subtotal ketone</i>                              |                                                                | 16.3%                             |
| pyrrole                                             | 107.5, 118                                                     | 6.7%                              |
| <i>Subtotal N-heterocyclic</i>                      |                                                                | 6.7%                              |
| 4-acetyl-anisole                                    | 26, 55.2, 114, 130.5, 163.5, 195.6                             | 6.8%                              |
| <i>Subtotal furans, ether, &amp; O-heterocyclic</i> |                                                                | 6.8%                              |
| glyoxal                                             | 28.62, 190.40, 194.74                                          | 2.4%                              |
| acetaldehyde                                        | 30.55, 199.68                                                  | 6.5%                              |
| benzaldehyde                                        | 129.08, 129.48, 134.43, 136.47, 192.28                         | 4.5%                              |
| <i>Subtotal aldehyde</i>                            |                                                                | 13.4%                             |
| <b>Total</b>                                        |                                                                | <b>100%</b>                       |

Table S19. Chemical composition of HTL-AP from HTL of lignin-rich digestates at pH 3.5 and 360 °C based on liquid-state <sup>13</sup>C NMR analysis.

| Detected compounds                          | Chemical shift (ppm)                                    | Relative spectral area percentage |
|---------------------------------------------|---------------------------------------------------------|-----------------------------------|
| acetamide                                   | 22.11, 170.66                                           | 2.8%                              |
| benzylamine                                 | 49.05, 128.40, 131.13, 132.50                           | 2.6%                              |
| <i>Subtotal amine &amp; amide</i>           |                                                         | 5.4%                              |
| phenol                                      | 115.48, 121.09, 129.79, 155.02                          | 4.5%                              |
| o-cresol                                    | 17.5, 118, 123.5, 127.5, 129.7, 134, 153.4              | 3.4%                              |
| catechol                                    | 119.5, 124, 146.2                                       | 6.6%                              |
| <i>Subtotal phenols</i>                     |                                                         | 14.5%                             |
| 3,5-dihydroxycinnamic acid                  | 114.5, 115, 115.4, 121.4, 126, 145, 145.5, 148.3, 167.8 | 5.0%                              |
| 2-oxovaleric acid                           | 13.4, 17, 35.5, 40, 162, 186.5                          | 4.0%                              |
| acetic acid                                 | 25.98, 184.11                                           | 9.3%                              |
| benzoic acid                                | 128.49, 129.40, 130.28, 133.83, 172.70                  | 7.2%                              |
| <i>Subtotal carboxylic acid &amp; ester</i> |                                                         | 25.5%                             |

| Detected compounds                                  | Chemical shift (ppm)                      | Relative spectral area percentage |
|-----------------------------------------------------|-------------------------------------------|-----------------------------------|
| hydroquinone                                        | 111.82, 124.74, 158.02, 178.29            | 5.9%                              |
| butanone                                            | 8.89, 30.03, 38.44, 211.47                | 2.6%                              |
| acetophenone                                        | 28.98, 131.04, 131.53, 136.87             | 4.4%                              |
| 2-pentanone                                         | 13.5, 17.8, 29.7, 45.5, 208               | 3.0%                              |
| <i>Subtotal ketone</i>                              |                                           | 15.9%                             |
| pyrrole                                             | 107.5, 118                                | 4.1%                              |
| <i>Subtotal N-heterocyclic</i>                      |                                           | 4.1%                              |
| 2-hydroxy-2-methyl-propanenitrile                   | 10.95, 120.79                             | 2.0%                              |
| mandelic acid nitrile                               | 120, 75.30, 174.77, 131.13, 132.5, 163.73 | 2.9%                              |
| <i>Subtotal azine &amp; nitrile</i>                 |                                           | 4.9%                              |
| 4-acetyl-anisole                                    | 26, 55.2, 114, 130.5, 163.5, 195.6        | 12.4%                             |
| <i>Subtotal furans, ether, &amp; O-heterocyclic</i> |                                           | 12.4%                             |
| benzaldehyde                                        | 129.08, 129.48, 134.43, 136.47, 192.28    | 8.3%                              |
| acetaldehyde                                        | 30.55, 199.68                             | 9.0%                              |
| <i>Subtotal aldehyde</i>                            |                                           | 17.3%                             |
| <b>Total</b>                                        |                                           |                                   |

Table S20. Chemical composition of HTL-AP from HTL of lignin-rich digestates at pH 8 and 320 °C based on liquid-state <sup>13</sup>C NMR analysis.

| Detected compounds                          | Chemical shift (ppm)                                                   | Relative spectral area percentage |
|---------------------------------------------|------------------------------------------------------------------------|-----------------------------------|
| benzidine                                   | 116, 127.5, 130.54, 148.23                                             | 6.3%                              |
| succinimide                                 | 30.2, 184                                                              | 2.0%                              |
| <i>Subtotal amine &amp; amide</i>           |                                                                        | 8.3%                              |
| catechol                                    | 119.5, 124, 146.2                                                      | 3.7%                              |
| phenol                                      | 115.48, 121.09, 129.79, 155.02                                         | 2.0%                              |
| 2-aminophenol                               | 114, 117, 120, 138, 142                                                | 5.8%                              |
| resorcinol                                  | 103.45, 108.79, 131.59, 158.77                                         | 6.4%                              |
| p-cresol                                    | 21.7, 117.7, 133, 156                                                  | 6.6%                              |
| 3-isopropylpyrocatechol                     | 22.5, 27, 113.5, 117.5, 119.8, 135.5, 142.5, 144.6                     | 4.0%                              |
| <i>Subtotal phenols</i>                     |                                                                        | 28.5%                             |
| 2-(2-methoxyphenyl)-acetic acid             | 35.65, 55.04, 110.54, 120.04, 124.04, 128.69, 130.14, 156.74, 172.5    | 6.6%                              |
| ethylacetoacetate                           | 14.04, 20.55, 30.04, 50.04, 60.04, 61.14, 90.04, 167.64, 200, 172, 176 | 2.3%                              |
| formyl acetate                              | 20, 156.5, 167.66                                                      | 3.3%                              |
| acetic anhydride                            | 21.75, 167.04                                                          | 5.4%                              |
| lactic acid                                 | 22.80, 71.25, 185.08                                                   | 2.6%                              |
| acetic acid                                 | 25.98, 184.11                                                          | 9.6%                              |
| 2-oxovaleric acid                           | 13.4, 17, 35.5, 40, 162, 186.5                                         | 4.5%                              |
| <i>Subtotal carboxylic acid &amp; ester</i> |                                                                        | 34.3%                             |
| 2-methyl pyrazine                           | 21.5, 142, 144, 145, 154                                               | 4.6%                              |
| pyridazine                                  | 127.2, 152                                                             | 7.2%                              |
| 5,7-dimethoxyquinoline                      | 55.5, 98, 99.5, 116.5, 118, 130.7, 150.5, 151, 156, 160.5              | 4.8%                              |
| <i>Subtotal N-heterocyclic</i>              |                                                                        | 16.6%                             |
| acetaldehyde                                | 30.55, 199.68                                                          | 8.1%                              |
| benzaldehyde                                | 129.08, 129.48, 134.43, 136.47, 192.28                                 | 4.2%                              |
| <i>Subtotal aldehyde</i>                    |                                                                        | 12.3%                             |
| <b>Total</b>                                |                                                                        |                                   |
|                                             |                                                                        | 100%                              |



Table S21. Chemical composition of HTL-AP from HTL of lignin-rich digestates at pH 8 and 360 °C based on liquid-state <sup>13</sup>C NMR analysis.

| Detected compounds                          | Chemical shift (ppm)                         | Relative spectral area percentage |
|---------------------------------------------|----------------------------------------------|-----------------------------------|
| acetamide                                   | 22.11, 170.66                                | 4.3%                              |
| 2-phenethylamine                            | 40.19, 43.60, 126.09, 128.8, 139.3           | 3.0%                              |
| <i>Subtotal amine &amp; amide</i>           |                                              | 7.3%                              |
| catechol                                    | 119.5, 124, 146.2                            | 9.8%                              |
| phenol                                      | 115.48, 121.09, 129.79, 155.02               | 10.0%                             |
| 2-aminophenol                               | 114, 117, 120, 138, 142                      | 9.0%                              |
| <i>Subtotal phenols</i>                     |                                              | 28.8%                             |
| benzoic acid                                | 128.49, 129.44, 130.28, 133.83, 172.7        | 5.6%                              |
| acetic acid                                 | 25.98, 184.11                                | 13.6%                             |
| formic acid                                 | 175.91                                       | 2.4%                              |
| chloropropanoic acid                        | 20.21, 51.76, 178.16                         | 2.6%                              |
| 2-hydroxy-3-methyl butyric acid             | 16.55, 19.45, 31.67, 75.04, 176.69           | 3.0%                              |
| levulinic acid                              | 26.8, 29.75, 38, 177.5, 208.1                | 6.4%                              |
| <i>Subtotal carboxylic acid &amp; ester</i> |                                              | 33.6%                             |
| 5-nitro-4H-1,2,3-triazol-4-one              | 125.15, 154.03, 216.11                       | 5.0%                              |
| 4H-1,2,3-triazol-4-one                      | 130.09, 210                                  | 6.0%                              |
| <i>Subtotal N-heterocyclic</i>              |                                              | 11.0%                             |
| acetonitrile                                | 1.16, 117.18                                 | 5.7%                              |
| <i>Subtotal azine &amp; nitrile</i>         |                                              | 5.7%                              |
| acetaldehyde                                | 30.55, 199.68                                | 4.6%                              |
| benzaldehyde                                | 129.08, 129.48, 134.43, 136.47,<br>192.28    | 4.3%                              |
| salicylaldehyde                             | 117.5, 119.7, 120.8, 134, 136, 161,<br>196.5 | 4.7%                              |
| <i>Subtotal aldehyde</i>                    |                                              | 13.6%                             |
| <b>Total</b>                                |                                              | 100%                              |

Table S22. Chemical composition of HTL-AP from HTL of cellulose-rich digestates at pH 3.5 and 320 °C based on liquid-state <sup>13</sup>C NMR analysis.

| Detected compounds                          | Chemical shift (ppm)                                     | Relative spectral area percentage |
|---------------------------------------------|----------------------------------------------------------|-----------------------------------|
| acetamide                                   | 22.11, 170.66                                            | 6.8%                              |
| <i>subtotal amine &amp; amide</i>           |                                                          | 6.8%                              |
| catechol                                    | 115.5, 120, 144.5                                        | 2.5%                              |
| phenol                                      | 115.48, 121.09, 129.79, 155.02                           | 5.9%                              |
| ethyl-2-methoxyphenol                       | 55.84, 110.89, 114.69, 120.04, 121.49,<br>146.02, 146.71 | 2.6%                              |
| <i>Subtotal phenols</i>                     |                                                          | 11.0%                             |
| glycolic acid                               | 63.93, 182.69                                            | 1.8%                              |
| acetic acid                                 | 25.98, 184.11                                            | 12.4%                             |
| levulinic acid                              | 28, 30, 38, 178, 207                                     | 9.9%                              |
| formic acid                                 | 175.91                                                   | 4.1%                              |
| <i>Subtotal carboxylic acid &amp; ester</i> |                                                          | 28.2%                             |
| 2-pentanone                                 | 13.5, 17.8, 29.7, 45.5, 208                              | 5.6%                              |
| 2,5-hexanedione                             | 29.65, 34.5, 207.2                                       | 7.2%                              |
| acetophenone                                | 28.98, 131.04, 131.53, 136.87                            | 7.6%                              |
| <i>Subtotal ketone</i>                      |                                                          | 20.4%                             |
| pyrrole                                     | 107.5, 118                                               | 7.1%                              |
| <i>Subtotal N-heterocyclic</i>              |                                                          | 7.1%                              |
| malononitrile                               | 9.8, 169.93                                              | 5.5%                              |

| Detected compounds                                  | Chemical shift (ppm)               | Relative spectral area percentage |
|-----------------------------------------------------|------------------------------------|-----------------------------------|
| <i>Subtotal azine &amp; nitrile</i>                 |                                    | 5.5%                              |
| furan-2-ylmethanol                                  | 57.5, 108, 110.5, 143, 155         | 6.3%                              |
| 4-acetyl-anisole                                    | 26, 55.2, 114, 130.5, 163.5, 195.6 | 5.0%                              |
| <i>Subtotal furans, ether, &amp; O-heterocyclic</i> |                                    | 11.3%                             |
| 3-butenal                                           | 13.71, 15.69, 45.82, 202.8         | 3.5%                              |
| glyoxal                                             | 28.62, 190.4, 194.74               | 2.2%                              |
| 2,2-dimethyl-3-oxobutanal                           | 19.1, 26.3, 60, 201.2, 207.5       | 1.0%                              |
| acetaldehyde                                        | 30.55, 199.68                      | 3.0%                              |
| <i>Subtotal aldehyde</i>                            |                                    | 9.7%                              |
| <b>Total</b>                                        |                                    | 100%                              |

Table S23. Chemical composition of HTL-AP from HTL of cellulose-rich digestates at pH 3.5 and 360 °C based on liquid-state <sup>13</sup>C NMR analysis.

| Detected compounds                                  | Chemical shift (ppm)                 | Relative spectral area percentage |
|-----------------------------------------------------|--------------------------------------|-----------------------------------|
| acetamide                                           | 22.11, 170.66                        | 7.2%                              |
| <i>Subtotal amine &amp; amide</i>                   |                                      | 7.2%                              |
| 2-aminophenol                                       | 114, 117, 120, 138, 142              | 3.4%                              |
| resorcinol                                          | 103.45, 108.79, 131.59, 158.77       | 2.9%                              |
| hydroquinone                                        | 111.82, 124.74, 158.02, 178.29       | 3.7%                              |
| phenol                                              | 115.48, 121.09, 129.79, 155.02       | 5.1%                              |
| <i>Subtotal phenols</i>                             |                                      | 15.1%                             |
| acetic acid                                         | 25.98, 184.11                        | 10.4%                             |
| levulinic acid                                      | 28, 30, 38, 178, 207                 | 4.8%                              |
| formyl acetate                                      | 20, 156.5, 167.66                    | 5.2%                              |
| benzoic acid                                        | 128.49, 129.4, 130.28, 133.83, 172.7 | 7.5%                              |
| <i>Subtotal carboxylic acid &amp; ester</i>         |                                      | 27.9%                             |
| acetoin                                             | 19.54, 24.94, 73.16                  | 3.9%                              |
| 2,5-hexanedione                                     | 29.65, 34.5, 207.2                   | 4.8%                              |
| acetophenone                                        | 28.98, 131.04, 131.53, 136.87        | 5.4%                              |
| 2-pentanone                                         | 13.5, 17.8, 29.7, 45.5, 208          | 2.2%                              |
| <i>Subtotal ketone</i>                              |                                      | 16.3%                             |
| 3-aminopyrazole                                     | 67.5, 94, 133.45, 155                | 6.6%                              |
| <i>Subtotal N-heterocyclic</i>                      |                                      | 6.6%                              |
| furan-2-ylmethanol                                  | 56.85, 107.5, 110.36, 142.3, 154.5   | 6.5%                              |
| 4-acetyl-anisole                                    | 26, 55.2, 114, 130.5, 163.5, 195.6   | 4.8%                              |
| <i>Subtotal furans, ether, &amp; O-heterocyclic</i> |                                      | 11.3%                             |
| 2-methyl-butanal                                    | 11, 13.02, 23.77, 47.5, 205          | 5.6%                              |
| 2-oxo-propanal oxime                                | 25.7, 150, 198.5                     | 4.8%                              |
| acetaldehyde                                        | 30.55, 199.68                        | 5.2%                              |
| <i>Subtotal aldehyde</i>                            |                                      | 15.6%                             |
| <b>Total</b>                                        |                                      | 100%                              |

Table S24. Chemical composition of HTL-AP from HTL of cellulose-rich digestates at pH 8 and 320 °C based on liquid-state <sup>13</sup>C NMR analysis.

| Detected compounds                          | Chemical shift (ppm)                                                | Relative spectral area percentage |
|---------------------------------------------|---------------------------------------------------------------------|-----------------------------------|
| acrylamide                                  | 129, 131, 171                                                       | 6.4%                              |
| <i>Subtotal amine &amp; amide</i>           |                                                                     | 6.4%                              |
| phenol                                      | 115.48, 121.09, 129.79, 155.02                                      | 10.2%                             |
| 2-aminophenol                               | 114, 117, 120, 138, 142                                             | 8.6%                              |
| resorcinol                                  | 103.45, 108.79, 131.59, 158.77                                      | 4.3%                              |
| p-cresol                                    | 21.7, 117.7, 133, 156                                               | 5.0%                              |
| <i>Subtotal phenols</i>                     |                                                                     | 28.1%                             |
| benzoic acid                                | 128.49, 129.4, 130.28, 133.83, 172.7                                | 5.4%                              |
| 2-(2-methoxyphenyl)-acetic acid             | 35.65, 55.04, 110.54, 120.04, 124.04, 128.69, 130.14, 156.74, 172.5 | 4.3%                              |
| acetic acid                                 | 25.98, 184.11                                                       | 10.3%                             |
| nicotinic acid                              | 123.71, 126.66, 136.9, 150.21, 153.18, 166.23                       | 3.7%                              |
| lactic acid                                 | 22.8, 71.25, 185.08                                                 | 3.5%                              |
| 2,3-dihydroxy-2-methyl-succinic acid        | 16.65, 37.5, 38.25, 172, 176.51                                     | 2.3%                              |
| <i>Subtotal carboxylic acid &amp; ester</i> |                                                                     | 29.5%                             |
| butanone                                    | 8.89, 30.03, 38.44, 211.47                                          | 5.0%                              |
| <i>Subtotal ketone</i>                      |                                                                     | 5.0%                              |
| 3-methylpyridine                            | 18.24, 122.5, 133.5, 137, 143.4, 150.5                              | 4.9%                              |
| 3-cyanopyridine                             | 110.04, 117.64, 123.25, 139.9, 152.5                                | 6.0%                              |
| 2-methyl pyrazine                           | 21.5, 142, 144, 145, 154                                            | 3.5%                              |
| 1H-pyrazole                                 | 104.65, 134.05                                                      | 2.2%                              |
| pyridazine                                  | 127.2, 152                                                          | 4.5%                              |
| <i>Subtotal N-heterocyclic</i>              |                                                                     | 21.1%                             |
| methyl glyoxal                              | 23, 27, 89.5, 91, 101.62, 207.84                                    | 2.6%                              |
| acetaldehyde                                | 30.55, 199.68                                                       | 7.3%                              |
| <i>Subtotal aldehyde</i>                    |                                                                     | 9.9%                              |
| <b>Total</b>                                |                                                                     | 100%                              |

Table S25. Chemical composition of HTL-AP from HTL of cellulose-rich digestates at pH 8 and 360 °C based on liquid-state <sup>13</sup>C NMR analysis.

| Detected compounds                          | Chemical shift (ppm)                          | Relative spectral area percentage |
|---------------------------------------------|-----------------------------------------------|-----------------------------------|
| nicotinamide                                | 123.29, 129.7, 135.07, 148.65, 151.78, 166.49 | 4.3%                              |
| acetamide                                   | 22.11, 170.66                                 | 4.2%                              |
| <i>Subtotal amine &amp; amide</i>           |                                               | 8.5%                              |
| phenol                                      | 115.48, 121.09, 129.79, 155.02                | 18.8%                             |
| catechol                                    | 115.5, 120, 144.5                             | 10.0%                             |
| <i>Subtotal phenols</i>                     |                                               | 28.8%                             |
| nicotinic acid                              | 123.71, 126.66, 136.9, 150.21, 153.18, 166.23 | 5.2%                              |
| picolinic acid                              | 124.6, 127.25, 137.5, 144, 144.85, 165.86     | 3.6%                              |
| benzoic acid                                | 128.49, 129.44, 130.28, 133.83, 172.7         | 7.5%                              |
| acetic acid                                 | 25.98, 184.11                                 | 10.4%                             |
| glutaric acid                               | 25.5, 40, 186.37                              | 4.0%                              |
| <i>Subtotal carboxylic acid &amp; ester</i> |                                               | 30.7%                             |
| 4H-1,2,3-triazol-4-one                      | 130.09, 210                                   | 6.0%                              |
| 5-nitro-4H-1,2,3-triazol-4-one              | 125.15, 154.03, 216.11                        | 3.0%                              |
| piperidine                                  | 25.5, 27.8, 47.5                              | 7.7%                              |
| <i>Subtotal N-heterocyclic</i>              |                                               | 16.7%                             |
| acetonitrile                                | 1.16, 117.18                                  | 5.5%                              |
| <i>Subtotal azine &amp; nitrile</i>         |                                               | 5.5%                              |
| glyceraldehyde                              | 64.76, 76.5, 92.5                             | 4.8%                              |
| acetaldehyde                                | 30.55, 199.68                                 | 5.0%                              |
| <i>Subtotal aldehyde</i>                    |                                               | 9.8%                              |
| <b>Total</b>                                |                                               | 100%                              |
